## 21 **Abstract**

22 HIV-1 replication commences inside the cone-shaped viral capsid, but timing, localization and mechanism  
23 of uncoating are under debate. We adapted a strategy to visualize individual reverse-transcribed HIV-1  
24 cDNA molecules and their association with viral and cellular proteins using fluorescence and correlative-  
25 light-and-electron-microscopy (CLEM). We specifically detected HIV-1 cDNA inside nuclei, but not in the  
26 cytoplasm. Nuclear cDNA initially co-localized with a fluorescent integrase fusion (IN-FP) and the viral CA  
27 (capsid) protein, but cDNA-punctae separated from IN-FP/CA over time. This phenotype was conserved in  
28 primary HIV-1 target cells, with nuclear HIV-1 complexes exhibiting strong CA-signals in all cell types. CLEM  
29 revealed cone-shaped HIV-1 capsid-like structures and apparently broken capsid-remnants at the position  
30 of IN-FP signals and elongated chromatin-like structures in the position of viral cDNA punctae lacking IN-  
31 FP. Our data argue for nuclear uncoating by physical disruption rather than cooperative disassembly of  
32 the CA-lattice, followed by physical separation from the pre-integration complex.

33

## 34 **Introduction**

35 Retroviral replication involves reverse transcription of the viral RNA genome and requires nuclear entry  
36 of the subviral complex to allow for chromosomal integration of the viral cDNA mediated by the viral  
37 integrase (IN) (Lusic & Siliciano, 2017). Whereas simple retroviruses require nuclear envelope breakdown  
38 during mitosis for productive replication, HIV-1 and other lentiviruses infect non-dividing cells, implying  
39 that the subviral complex can pass through the intact nuclear envelope (Suzuki & Craigie, 2007). Reverse  
40 transcription mediated by the viral reverse transcriptase (RT) is initiated in the cytoplasm, but recent  
41 evidence indicates that cDNA synthesis is completed inside the nucleus (Burdick et al., 2020; Dharan et  
42 al., 2020; Selyutina et al., 2020), at least in the case of HIV-1. The cytoplasm is a hostile environment for  
43 retroviral genome replication: exposure of cytoplasmic DNA to cellular nucleic acid sensors would lead to  
44 induction of innate immunity (Doitsh et al., 2014; Monroe et al., 2014), thereby aborting viral infection.  
45 The viral cone-shaped capsid apparently plays a central role in guiding and shielding (Rasaiyaah et al.,  
46 2013) the genome through the cytosolic environment (Campbell & Hope, 2015; Novikova et al., 2019). It  
47 consists of ~1,200-1,500 CA molecules assembled into hexamers and pentamers (Briggs et al., 2003),  
48 which have been shown to interact with components of the nuclear pore complex (NPC) (Dharan et al.,  
49 2016; Fernandez et al., 2019; Lee et al., 2010; Schaller et al., 2011; Zhou et al., 2011), implying a role for  
50 the CA-lattice in nuclear entry. However, the HIV-1 capsid, measuring ~60 nm at its wide end (Mattei et

51 al., 2016), is considered to exceed the dimensions of the NPC channel with a reported maximal diameter  
52 of ~40 nm (von Appen et al., 2015). This implies that capsid uncoating should occur – at least partially –  
53 prior to nuclear entry, and various publications reported uncoating either in the cytoplasm (Cosnefroy et  
54 al., 2016; Mamede et al., 2017; Xu et al., 2013) or at the nuclear pore (Francis & Melikyan, 2018) , with  
55 some evidence for cell type dependent differences. On the other hand, nuclear HIV-1 pre-integration  
56 complexes (PIC) were found to retain varying amounts of CA molecules (Bejarano et al., 2019; Burdick et  
57 al., 2020; Chin et al., 2015; Hulme et al., 2015; Stultz et al., 2017; Zila et al., 2019), at least in certain cell  
58 types (Zila et al., 2019), and recent reports indicating the presence of intact capsid lattice (Dharan et al.,  
59 2020; Selyutina et al., 2020) and capsid-like structures (Zila et al., 2020) inside the nucleus challenged the  
60 current models of early HIV-1 replication. Accordingly, the timing, subcellular localization, trigger and  
61 mechanism of HIV-1 capsid uncoating are still under debate.

62 Studying early HIV-1 replication is hampered by the fact that most cytoplasmic entry events appear to be  
63 non-productive in tissue culture (Klasse, 2015; Sanjuán, 2018). Therefore, characterization of individual  
64 subviral complexes containing viral cDNA with respect to their content, subcellular distribution and  
65 trafficking is required to shed light on the pathway of productive replication. Viral cDNA can be visualized  
66 in fixed cells using fluorescence in-situ hybridization (FISH) (Marini et al., 2015) or its derivatives using  
67 branched probes (Chin et al., 2015), but the harsh assay conditions destroy the native cellular  
68 environment and impair immunofluorescence analysis. Incorporation of the modified nucleoside 5-  
69 ethynyl-2'-deoxyuridine (EdU) allowed the detection of actively transcribing HIV-1 complexes by  
70 visualizing *de novo* synthesized viral DNA *via* click chemistry (Peng et al., 2015; Stultz et al., 2017), but this  
71 approach is also limited to fixed cells and cellular extraction precludes high resolution analysis (Müller et  
72 al., 2019). To overcome these limitations, we adapted a live cell compatible genetically encoded system  
73 (ANCHOR) that allows single molecule gene labeling (Germier et al., 2017; Saad et al., 2014), and has  
74 previously been applied for visualization of viral DNA (Blanco-Rodriguez et al., 2020; Komatsu et al., 2018;  
75 Mariamé et al., 2018). This system is based on the prokaryotic chromosomal partitioning system ParB-  
76 parS, where ParB (designated OR) specifically binds the parS seed sequence (designated ANCH). Multiple  
77 copies of parS introduced into the HIV-1 genome act as nucleation sites to oligomerize the fluorescently  
78 labelled OR protein when the reverse transcribed ANCH cDNA sequence becomes accessible to the fusion  
79 protein.

80 Here, we show that HIV-1 cDNA containing subviral complexes associated with CA are detected in the  
81 nucleus of infected cells, including primary CD4<sup>+</sup> T cells. Over time, these nuclear complexes segregate

82 from their CA content and the bulk of viral replication proteins, confirming nuclear uncoating. Using CLEM,  
83 we detected capsid-like structures at the position of nuclear IN-FP-containing complexes, whereas  
84 elongated, chromatin-like densities were observed at the position of viral cDNA punctae. Importantly,  
85 strong CA signals were observed on nuclear HIV-1 complexes in all cell types analyzed, indicating that prior  
86 failure to detect nuclear CA was largely due to masked epitopes.

87

## 88 **Results**

### 89 **The ANCHOR system enables visualization of integrated and unintegrated HIV cDNA in the nucleus of** 90 **infected cells**

91 To test for retention of the ANCH sequence and efficiency of visualizing HIV-1 cDNA following reverse  
92 transcription, we stably transduced HeLa-based TZM-bl cells with different amounts of an ANCH  
93 containing HIV-1-based vector. These cell populations were subsequently transduced or transfected with  
94 an expression vector for eGFP.OR3 (Figure 1 — figure supplement 1a). Confocal microscopy revealed  
95 distinct eGFP.OR3 punctae in the nuclei of > 90 % of transfected cells (Figure 1 — figure supplement 1b-  
96 d). At low multiplicities of transduction with the ANCH-vector, where the majority of cells is expected to  
97 originate from a single integration event, we observed an average of  $1.6 \pm 0.29$  and  $1.4 \pm 0.34$  eGFP.OR3  
98 punctae per nucleus (Figure 1 — figure supplement 1d). The number of punctae correlated with the  
99 multiplicity of transduction over a wide range (Figure 1 — figure supplement 1d). Of note, the eGFP.OR3  
100 signal was stable for more than four weeks (when unintegrated viral cDNA species are degraded)  
101 suggesting that integrated viral DNA can be detected. Thus, the ANCH sequence is retained during reverse  
102 transcription, and this approach can be used to detect HIV-1 cDNA during the early replication phase.

103 Next, we introduced the ~1,000 bp ANCH sequence into the HIV-1 proviral plasmid pNLC4-3 (Bohne &  
104 Kräusslich, 2004) (HIV ANCH) replacing part of the *env* gene (Figure 1a). Virus-like particles were  
105 pseudotyped with the vesicular stomatitis virus G protein (VSV-G) or HIV-1 Env as indicated and also  
106 incorporated exogenously expressed IN (Albanese et al., 2008) tagged with a fluorescent marker (IN-FP)  
107 for visualization of subviral replication complexes. These particles were used to infect polyclonal TZM-bl  
108 cell populations stably transduced to express OR3 fused with either eGFP, mScarlet (Bindels et al., 2016)  
109 or the stainable SNAP-tag (Keppler et al., 2003); these cells also stably expressed fluorescently tagged  
110 Lamin B1 (LMNB1) to clearly distinguish nuclear and cytoplasmic events. Figure 1b shows TZM-bl  
111 eBFP2.LMNB1 and eGFP.OR3 expressing cells infected with HIV ANCH. Distinct infection-induced eGFP

112 punctae were clearly detected in the nuclei of these cells, but were not observed in the cytoplasm where  
113 eGFP.OR3 was diffusely distributed (Figure 1b). Distinct nuclear eGFP punctae were not detected in  
114 uninfected cells.

115 To determine whether HIV ANCH cDNA became chromosomally integrated, we infected the human SupT1  
116 T-cell line with HIV ANCH and analyzed the copy number of integrated proviral genomes by semi-  
117 quantitative Alu-PCR; this experiment could not be performed in TZM-bl cells, since these cells carry  
118 multiple HIV-1 LTR copies from prior lentiviral vector transductions. Integrated proviral DNA was readily  
119 detected in HIV ANCH infected SupT1 cells, but was not observed when infection was performed in the  
120 presence of an RT- or IN-inhibitor (Figure 1c). Similar to TZM-bl cells, SupT1 cells also showed nuclear  
121 eGFP.OR3 punctae following infection with HIV ANCH (see below, Figure 6 — figure supplement 1a). We  
122 then determined the number of eGFP.OR3 punctae in TZM-bl cells using confocal microscopy of cells fixed  
123 at different time points after infection with HIV ANCH (Figure 1d) and performed parallel quantitation of  
124 total HIV-1 cDNA and 2-LTR circles (representing unintegrated nuclear HIV-1 cDNA) using digital droplet  
125 PCR (ddPCR) (Figure 1e). Total cDNA levels became saturated at 10 hours post infection (h p.i.) and 2-LTR  
126 circles peaked at 24 h p.i.; both species strongly declined over the following five days (Figure 1e). eGFP  
127 punctae, on the other hand, increased over the first 72 h, but then remained stable over the following  
128 three days despite the observed loss of HIV-1 cDNA species (Figure 1d). Taken together, these results  
129 clearly indicated that integrated HIV-1 DNA can be detected using the ANCHOR system. To determine  
130 whether detection of integrated proviral copies may be influenced by RNA transcription at the respective  
131 site, we compared the number of eGFP.OR3 punctae in HIV ANCH infected TZM-bl cells treated with the  
132 CDK9/p-TEFb inhibitor Flavopiridol or solvent. No difference was observed (Figure 1 — figure supplement  
133 2a-c), suggesting that the dynamic nature of OR3 recruitment does not interfere with transcription.

134

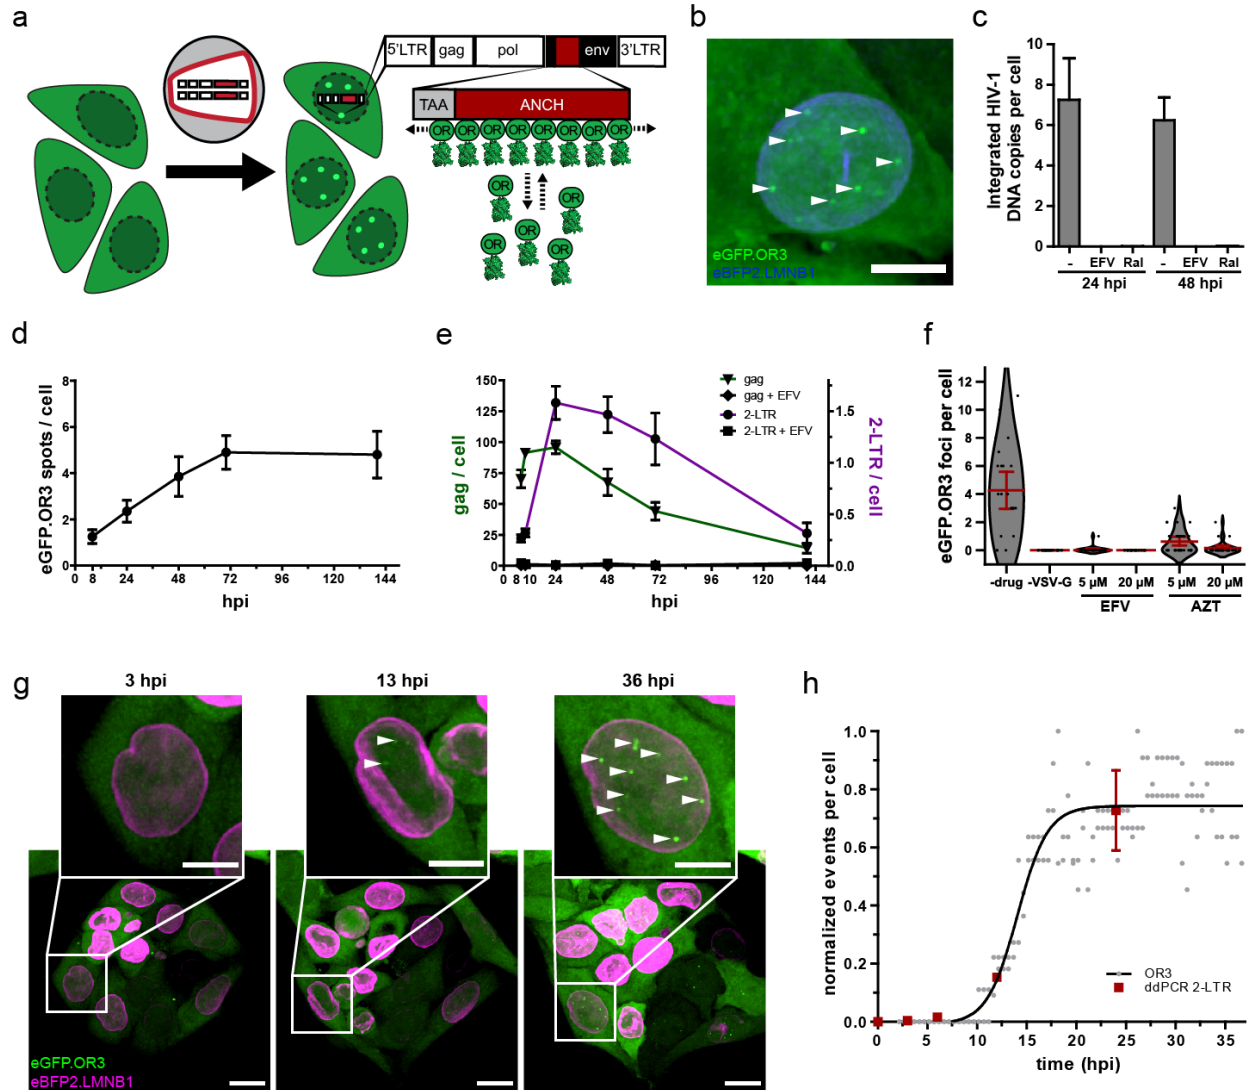

135

136 **Figure 1 Visualization of HIV-1 dsDNA within the nucleus of infected cells.** (a) Scheme of the ANCHOR dsDNA  
 137 visualization system. Fluorescently tagged OR3 binds to the ANCH sequence on the viral dsDNA. (b) eGFP.OR3  
 138 puncta detected in the nuclei of infected cells. Tz45-bl eBFP2.LMNB1 eGFP.OR3 cells were infected with VSV-G  
 139 pseudotyped HIV-1<sub>NL4-3</sub> ANCH (30  $\mu$ Units RT/cell, MOI 6), fixed at 55 h p.i. and imaged using SDCM. Six independent  
 140 experiments with two independent virus preparations were performed. Maximum intensity projection (MIP) of a  
 141 representative cell is shown. Note that some cells show one or two cytoplasmic, mostly perinuclear, infection-  
 142 independent accumulations of the OR3 fusion protein, which we identified as multivesicular bodies (MVB) by CLEM  
 143 (Figure 1 — figure supplement 3). Scale bar: 5  $\mu$ m. (c) Quantification of integrated HIV-1<sub>NL4-3</sub> ANCH provirus using  
 144 nested Alu-LTR PCR. SupT1 cells were infected using VSV-G pseudotyped HIV ANCH (10  $\mu$ U RT/cell). Raltegravir (RAL)  
 145 or Efavirenz (EFV) were added at the time of infection as indicated. Data are shown for one experiment performed  
 146 in biological triplicates; error bars represent SD. (d,e) eGFP.OR3 punctae are stable for more than 6 days while total  
 147 and unintegrated DNA declined. Quantification of eGFP.OR3 punctae by SDCM (d), and gag and 2-LTR cDNA by  
 148 ddPCR (e) over time within the same experiment. Infection was performed as in (b). (d) Data from one of two  
 149 independent experiments (n = 20 cells per time point, error bars represent SEM). (e) Data from one experiment  
 150 performed in biological triplicates (error bars represent SEM). (f) Detection of eGFP.OR3 punctae is HIV-1 cell fusion  
 151 and reverse transcription dependent. Tz45-bl eBFP2.LMNB1 and eGFP.OR3 cells were infected with VSV-G  
 152 pseudotyped NNHIV ANCH (10  $\mu$ U RT/cell) and imaged under live conditions at 27 h p.i.. Control experiments were  
 153 performed adding HIV-1 RT inhibitors EFV or azidothymidine (AZT) at time of infection or using particles lacking a

154 fusion protein (“-VSV-G”). n = 20-29 cells were analyzed per sample and error bars represent 95 % CI; The graph  
155 shows data from one of three independent experiments. (g,h) Live cell imaging of vDNA punctae formation. TZM-bl  
156 eBFP2.LMNB1 and eGFP.OR3 cells were infected with NNHIV ANCH (30  $\mu$ U RT/cell) and image acquisition by SDCM  
157 was initiated at 2 h p.i.. 3D stacks were acquired every 30 min for 36 h. Representative data from one of four  
158 independent experiments are shown. MIP of a representative cell is shown. Scale bars: 10  $\mu$ m (overview), 5  $\mu$ m  
159 (enlargement). See Video 1. (h) Quantification of eGFP.OR3 punctae formation in cells from video shown in (g).  
160 Analyzed was the eGFP.OR3 punctae formation from two cells within the field of view (FOV) with each point  
161 representing the normalized amount of OR3 punctae per nucleus at the respective timepoint. Data were fit to a  
162 logistic growth model giving  $t_{1/2} = 14.1 \pm 0.5$  min. Detection of 2-LTR circles (mean and SEM) by ddPCR in biological  
163 triplicates is shown for TZM-bl cells infected with NNHIV WT.

164

165 Next, we generated a non-infectious derivative of HIV ANCH termed NNHIV ANCH to allow live cell imaging  
166 outside the BSL3 facility. NNHIV ANCH is based on the previously reported plasmid NNHIV that carries  
167 mutations in the active site of IN and a deletion in the *tat* gene (IN<sub>D64N/D116N</sub> *tat* <sub>$\Delta$ 33-64bp</sub>), thereby retaining  
168 reverse transcription and nuclear import, but lacking the capacity to integrate and transcribe (Zila et al.,  
169 2020). TZM-bl eGFP.OR3 cells infected with VSV-G pseudotyped NNHIV ANCH also showed nuclear  
170 eGFP.OR3 punctae (Figure 1f-h) indicating that unintegrated HIV-1 cDNA is detected by the ANCHOR  
171 system as well. eGFP punctae were not detected when cells were treated with NNHIV ANCH lacking VSV-  
172 G and were lacking or strongly reduced in the presence of the RT inhibitors efavirenz (EFV) or  
173 azidothymidine (AZT) (Figure 1f).

174 To investigate the dynamics of appearance of eGFP.OR3 punctae in NNHIV ANCH infected TZM-bl cells,  
175 we performed live cell imaging experiments using spinning disk confocal microscopy (SDCM). The onset  
176 of marker recruitment to viral cDNA in the nucleus was observed at 7-8 h p.i., while the half-maximal  
177 signal was reached between 13 and 15 h p.i. (Figure 1g, h; Video 1). Again, no infection-induced eGFP.OR3  
178 punctae were detected in the cytosol of infected cells. The onset of nuclear HIV-1 2-LTR detection using  
179 ddPCR coincided with the appearance of eGFP.OR3 punctae (Figure 1h). Formation of both 2-LTR circles  
180 and eGFP.OR3 punctae requires viral cDNA to be synthesized and accessible to proteins not present in the  
181 subviral replication complex (2-LTR formation requires nuclear NHEJ components and ligase IV (Li et al.,  
182 2001)). Accordingly, the lack of cytoplasmic eGFP.OR3 punctae may be due to incomplete cDNA synthesis  
183 in the cytoplasm and/or to cDNA only becoming accessible to the fusion protein upon full capsid uncoating  
184 in the nucleus. To address this question we focused on the timing and quantification of reverse  
185 transcription in the described system.

186

187

188 **Nuclear eGFP.OR3 punctae contain higher amounts of *de novo* synthesized HIV-1 cDNA than nuclear IN-**  
189 **positive complexes not recruiting eGFP.OR3**

190 FISH analysis revealed a large amount of RT products in the cytoplasm of infected cells, where no  
191 eGFP.OR3 punctae were observed (Figure 2a). When infecting TZM-bl cells with equal amounts of NNHIV  
192 ANCH for 24 h, we observed ~130 *gag* (Figure 2b) and two to three 2-LTR cDNA molecules (Figure 2c) per  
193 cell and ~4 nuclear eGFP.OR3 punctae per cell (Figure 1f). These results clearly showed that the majority  
194 of late RT products - including all cytoplasmic products - are not associated with eGFP.OR3.

195

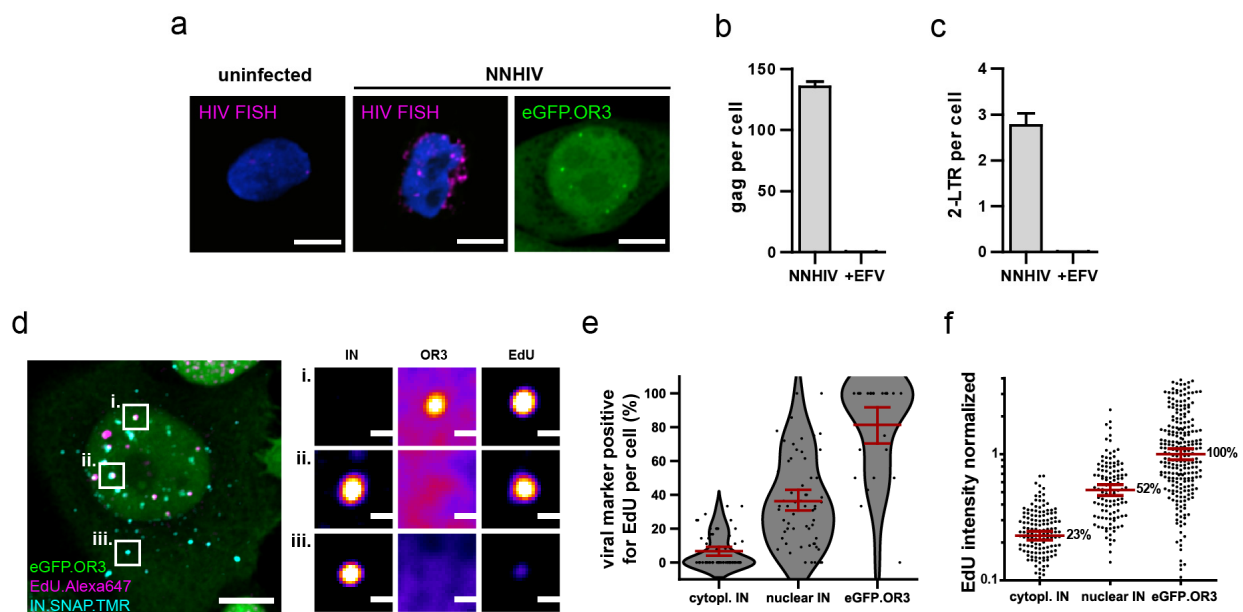

196

197 **Figure 2. Viral cDNA in cytosolic complexes does not recruit OR3 proteins and contains less DNA compared to**  
198 **nuclear complexes.** (a) HIV FISH staining of TZM-bl cells infected with VSV-G pseudotyped NNHIV ANCH (30 μU/RT  
199 cell; 24 h p.i.). A cell showing nuclear eGFP.OR3 signals from a different experiment is shown for comparison. Scale  
200 bars: 5 μm. (b,c) ddPCR quantification of late RT products (*gag* region; b) and 2-LTR circles (c). TZM-bl cells were  
201 infected using the same amount of VSV-G pseudotyped NNHIV ANCH (10 μU RT/cell, 24 h p.i.) as in Figure 1f. Mean  
202 and SEM of one experiment performed in biological triplicates are shown. (d) TZM-bl eBFP2.LMNB1 and eGFP.OR3  
203 expressing cells were infected with VSV-G pseudotyped and IN.SNAP.TMR labelled NNHIV ANCH (30 μU RT/cell) in  
204 the presence of EdU. Cellular DNA synthesis was blocked by aphidicolin (APC). At 24 h p.i. cells were fixed and click  
205 labelled. Two independent experiments were performed in biological triplicates. A 2 μm MIP of a representative cell  
206 and three enlarged single z slices are shown. Scale bars: 5 μm (MIP) and 1 μm (enlargements). (e,f) Quantification of  
207 data from the experiment described in (d). Pooled data from one experiment performed in biological triplicates are  
208 shown, with data points representing individual cells (e) or subviral complexes (f); error bars represent 95 % CI. (e)  
209 Percentage of EdU positive viral marker spots (IN or OR3) per cell. (f) Intensity of EdU signals associated with the  
210 respective viral marker. Data were normalized to the mean signal of eGFP.OR3 punctae. Differences are statistically  
211 significant ( $p < 0.0001$ ; two-tailed Student's t-test).

212



213 Progress of reverse transcription was also assessed at the single particle level. For this, we infected cells  
214 with NNHIV ANCH carrying fluorescently tagged IN-FP in the presence of EdU followed by fluorescent click  
215 labelling of newly synthesized DNA at different time points p.i.. Cellular DNA synthesis was inhibited by  
216 the DNA polymerase  $\alpha/\delta$  inhibitor aphidicolin (APC). Co-localization with EdU was observed for 7 % of IN-  
217 FP positive structures in the cytoplasm (95 % CI of mean: 4-9 %) and for 36 % of IN-FP positive complexes  
218 in the nucleus (95 % CI of mean: 29-43 %). Importantly, 81 % of nuclear eGFP.OR3 punctae were positive  
219 for EdU (95 % CI of mean: 70-93 %; Figure 2d, e). While some nuclear EdU-positive complexes were  
220 positive for both the IN-FP and eGFP.OR3, we also observed HIV-1 cDNA containing complexes that were  
221 only positive for either IN-FP or eGFP.OR3 (Figure 2d, panels i and ii). The average EdU signal was lower  
222 on cytoplasmic than on nuclear HIV-1 complexes and was highest on eGFP.OR3 punctae. When setting  
223 the EdU signal for eGFP.OR3 punctae to 100 %, the relative EdU signal was significantly reduced to 23 %  
224 ( $p < 0.0001$ ) on cytoplasmic IN-positive complexes and to 52 % ( $p < 0.0001$ ) on nuclear IN-positive  
225 complexes (Figure 2f). These observations support recent reports that reverse transcription is completed  
226 inside the nucleus (Burdick et al., 2020; Dharan et al., 2020; Selyutina et al., 2020) and indicate that the  
227 viral cDNA only becomes detectable to eGFP.OR3 when reverse transcription has been completed.

228

### 229 **HIV cDNA separates from IN-fusion proteins in the nucleus of infected cells**

230 The low degree of co-localization between the fluorescent IN fusion protein and eGFP.OR3 on EdU-  
231 positive nuclear punctae at 24 h p.i. (Figure 2d) prompted us to analyze the relative distribution of both  
232 fluorescent proteins in a time resolved manner after NNHIV ANCH infection. At 8 h p.i.,  $70 \pm 11$  % of  
233 nuclear eGFP.OR3 punctae were also positive for IN.SNAP (Figure 3a-c). This co-localization was largely  
234 lost at 24 h p.i. with only  $14 \pm 6$  % of nuclear eGFP.OR3 punctae positive for IN.SNAP (Figure 3a-c).  
235 Strikingly, IN.SNAP punctae were often observed in close vicinity of eGFP.OR3 punctae at this later time  
236 point (Figure 3a, right panel), suggesting that they may have separated from a common complex. Similar  
237 results were observed for HIV-1 ANCH (Figure 3 — figure supplement 1a), an integration competent  
238 lentiviral vector containing ANCH (Figure 3 — figure supplement 1b), and when particles were  
239 pseudotyped with HIV-1 Env instead of VSV-G (Figure 3 — figure supplement 1c). These results showed  
240 that the observed phenotype was not dependent on the cytosolic entry pathway or on integration  
241 competence. To directly address the possibility of separation of the proviral cDNA from IN.SNAP, we  
242 performed live cell imaging of infected cells. We observed gradual loss of the IN.SNAP signal correlating  
243 with increased eGFP.OR3 recruitment and eventual separation of eGFP.OR3 punctae and IN.SNAP

244 containing complexes (Figure 3d, e, Video 2). Of note, we occasionally observed consecutive appearance  
 245 of two individual eGFP.OR3 punctae and their subsequent separation from the same IN.SNAP complex  
 246 (Video 3), suggesting that single diffraction limited IN.SNAP punctae may correspond to multiple cDNA  
 247 containing subviral HIV-1 complexes.  
 248

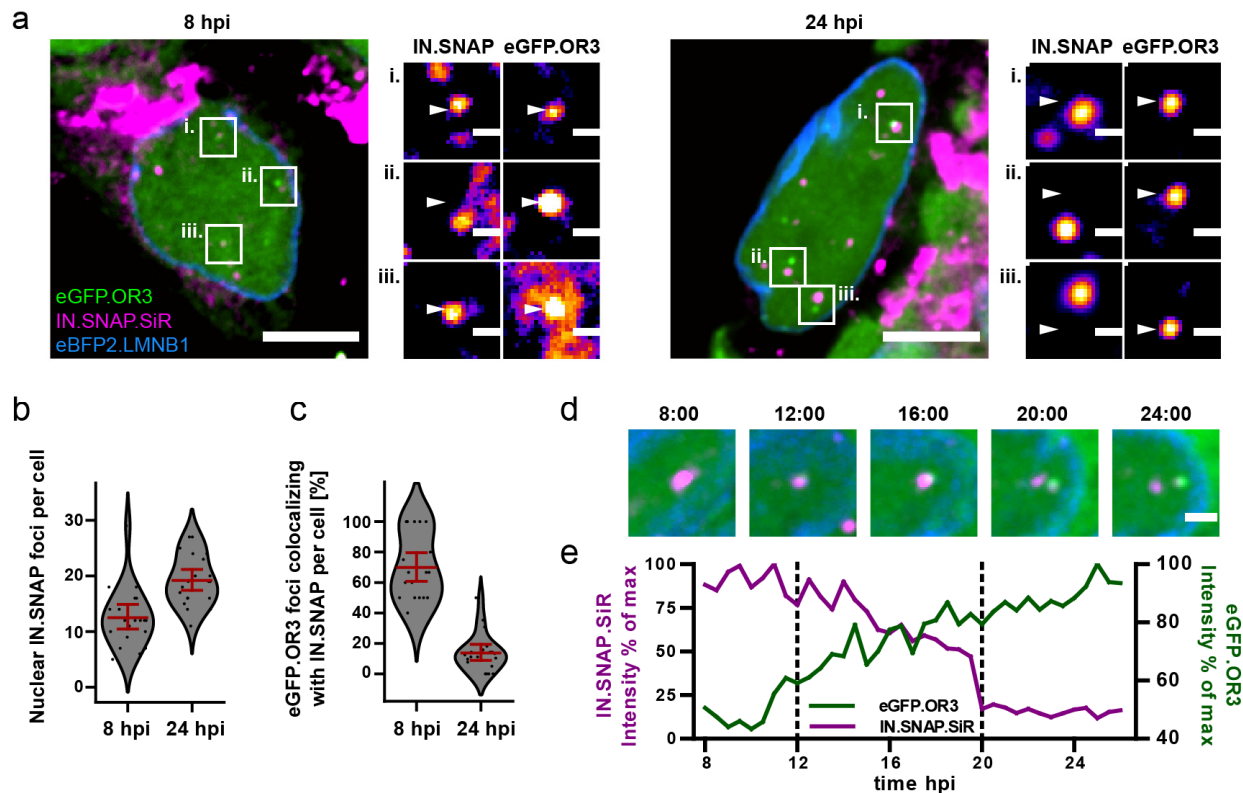

249  
 250 **Figure 3 Separation of viral cDNA from IN marker within the nucleus.** (a) TZM-bl eBFP2.LMN1 eGFP.OR3 cells were  
 251 infected with VSV-G pseudotyped and IN.SNAP.SiR labelled NNHIV ANCH particles (30  $\mu$ U RT/cell), fixed at 8 and 24  
 252 h.p.i as indicated and imaged by SDCM. A 1  $\mu$ m MIP of a representative cell and three enlarged single z slices are  
 253 shown. Scale bars: 10  $\mu$ m (MIP) and 1  $\mu$ m (enlargements). The nuclear background of eGFP.OR3 was subtracted in  
 254 enlargements for clarity. The figure shows representative images from one of three independent experiments. (b)  
 255 Number of nuclear IN.SNAP punctae/cell detected at the indicated time p.i.;  $13 \pm 3$  punctae/cell (8 h p.i.;  $\pm 95$  % CI)  
 256 and  $19 \pm 2$  punctae/cell (24 h p.i.;  $\pm 95$  % CI). Error bars represent 95 % CI. (c) eGFP.OR3 and IN.SNAP co-localization  
 257 observed over time;  $70 \pm 11$  % (8 h p.i.;  $\pm 95$  % CI) and  $14 \pm 6$  % (24 h p.i.;  $\pm 95$  % CI). Error bars represent 95 % CI. (d)  
 258 Live imaging of IN.SNAP.SiR (magenta) and eGFP.OR3 (green) signal separation within the nucleus. eBFP2.LMN1 is  
 259 shown in blue. The figure shows individual frames from Video 2 (4.5  $\mu$ m MIP) recorded at the indicated times (h:min  
 260 p.i.). Scale bar: 2  $\mu$ m; one of three independent experiments. Also see Video 3. (e) Relative intensities of IN.SNAP.SiR  
 261 and eGFP.OR3 fluorescence detected at the eGFP.OR3 focus in (d). The plot comprises data corresponding to the  
 262 position of the respective IN.SNAP focus recorded before the appearance of eGFP.OR3 (8-11 h p.i.). The area  
 263 between the dotted lines corresponds to the period of colocalization between the major parts of the IN.SNAP signal  
 264 and the eGFP.OR3 signal.

265

266 **Nuclear IN punctae exhibit a strong signal for CA and CPSF6 and correspond to clustered subviral**  
267 **particles**

268 The observation that the IN.SNAP signal remained as a distinct cluster after separation of the eGFP.OR3-  
269 associated viral cDNA suggested that these clusters constitute a stable complex potentially containing  
270 other viral and cellular proteins held together by a scaffold. The viral capsid or a capsid-derived structure  
271 would be an obvious candidate for such a scaffold, but earlier studies detected no or only weak CA IF  
272 signals on nuclear HIV-1 complexes in HeLa derived cell lines (Peng et al., 2015), while a recent study  
273 reported strong nuclear signals for CA fused to GFP (Burdick et al., 2020). We decided to revisit this issue,  
274 since we had previously observed that CA immunostaining efficiency in the nucleus strongly depended on  
275 fixation and extraction conditions (Zila et al., 2019). Following extraction with methanol we indeed  
276 consistently detected a clear CA-specific signal co-localizing with most IN-positive punctae inside the  
277 nucleus (Figure 4a, top panel). Furthermore, these IN-positive punctae were also strongly positive for the  
278 host protein cleavage and polyadenylation specificity factor 6 (CPSF6) that binds specifically to the  
279 hexameric CA lattice (Figure 4a, bottom panel). Cells in this experiment had been treated with APC to  
280 arrest the cell cycle and prevent entry into mitosis, indicating that HIV-1 capsids or capsid-derived  
281 structures are able to transit the nuclear pore in HeLa derived cells, as had been reported for terminally  
282 differentiated macrophages (Bejarano et al., 2018; Stultz et al., 2017). To further analyze the  
283 ultrastructure of these nuclear CA-containing complexes, we employed stimulated emission depletion  
284 (STED) nanoscopy and correlative light and electron microscopy (CLEM).

285 The mature HIV-1 capsid contains ca. 50 % of the total CA content of the intact virion and post-fusion  
286 cytoplasmic capsids therefore exhibit a weaker CA signal than complete virions (Zila et al., 2019).  
287 Accordingly, CA specific immunofluorescence would be expected to be lower for nuclear complexes  
288 compared to cell-associated particles that represent a mixture of post-fusion particles and complete  
289 particles at the plasma membrane or endocytosed in the cytosolic region. However, the observed intensity  
290 of the CA signal on nuclear HIV-1 complexes was slightly higher than that observed for cell-associated  
291 particles (Figure 4b). This may be explained by exposure of additional epitopes due to capsid remodelling  
292 and/or by clustering of capsid-derived structures in a single diffraction limited spot. In order to investigate  
293 the latter possibility, we used STED nanoscopy to resolve individual subviral structures with a resolution  
294 of < 50 nm. Multiple individual CA signals in close vicinity to each other could be resolved within the area  
295 of a single focus detected in confocal mode (Figure 4c and d). For a more detailed analysis of the  
296 associated structures, we performed CLEM as described in the following section. IN.SNAP-positive and

297 eGFP.OR3-negative nuclear punctae detected by fluorescence microscopy could be correlated with single  
 298 or multiple electron-dense cone-shaped structures, whose shapes and dimensions closely resembled  
 299 mature HIV-1 capsids (Figure 4e, Video 4). STED nanoscopy of nuclear SNAP.OR3-positive punctae  
 300 corresponding to viral cDNA identified elongated structures (Figure 4f); in this case, only a single object  
 301 was resolved by STED nanoscopy at each diffraction-limited position.  
 302

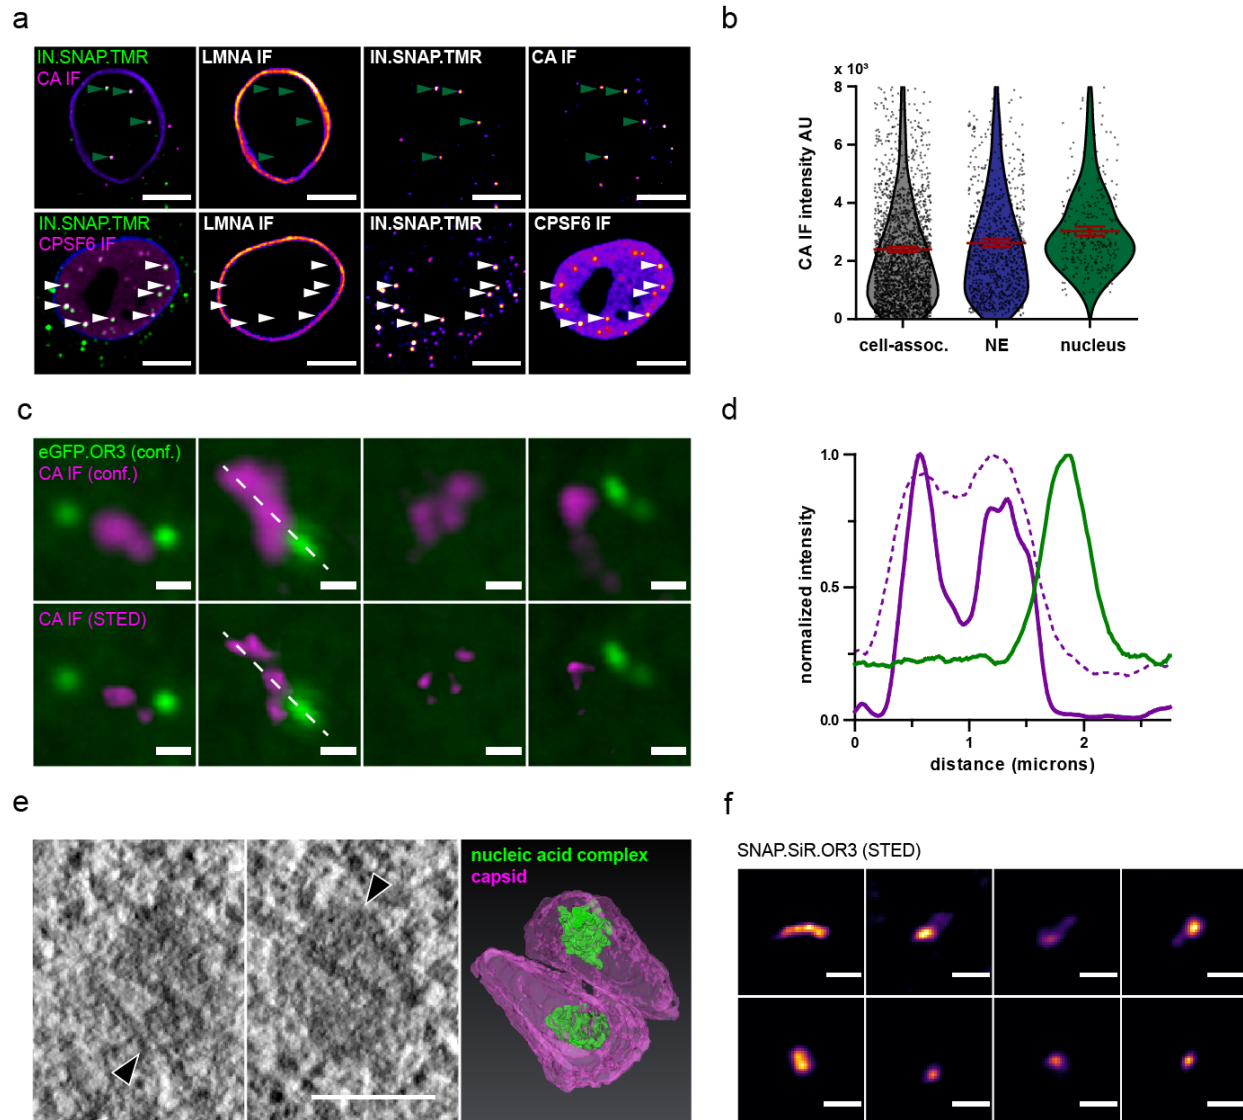

303  
 304 **Figure 4 HIV-1 capsids cluster within the nucleus of HeLa derived cells. (a)** IF detection of HIV-1 CA (top panel) and  
 305 CPSF6 (bottom panel) in the nuclei of T2M-bl cells treated with APC and infected with VSV-G pseudotyped NNHIV  
 306 ANCH labelled with IN.SNAP.TMR (30  $\mu$ U RT/cell) and fixed at 24 h p.i.. Data from one of three independent  
 307 experiments are shown. Scale bars: 10  $\mu$ m. **(b)** Quantification of CA intensities at IN.SNAP.TMR spots. Dots represent  
 308 individual subviral complexes localized at the cytosol/plasma membrane (cell-assoc.), the NE or the nucleus; error  
 309 bars represent SEM. Cells from five fields of view were analyzed (n = 2,610, 932 and 286 particles, respectively). (c)

310 STED nanoscopy of CA accumulation at diffraction limited spots. Shown are four examples of nuclear CA and OR3  
311 signals. TZM-bl eBFP2.LMNB1 and eGFP.OR3 cells were infected as in (a) without APC treatment; bottom panel  
312 shows STED microscopy of CA signals. Scale bars: 500 nm (d) Intensity profiles measured along the dashed white line  
313 in (c) normalized to the respective maximal value. Magenta, CA intensities in STED mode; dashed magenta, CA  
314 intensities in confocal mode; green, eGFP.OR3 intensities in confocal mode. (e) Electron tomography of NNHIV  
315 capsids detected in the nucleus. eGFP.OR3 expressing TZM-bl cells were infected with VSV-G pseudotyped NNHIV  
316 ANCH labelled with IN.SNAP.SiR (30  $\mu$ U RT/cell) and high pressure frozen at 24 h p.i. Left and middle panels show  
317 slices through a tomographic reconstruction at the position within the nucleus correlated to an IN.SNAP spot  
318 (negative for eGFP.OR3). Arrowheads point to two closely associated cone-shaped structures where the wide end of  
319 one cone is oriented towards the narrow end of the other cone. Scale bar: 100 nm. The right panel shows the  
320 segmented and isosurface rendered structure of these cones. Magenta, capsid; green, nucleic acid containing  
321 replication complex. See Video 4. (f) STED nanoscopy of SNAP.OR3 expressing TZM-bl cells infected with VSV-G  
322 pseudotyped NNHIV ANCH (30  $\mu$ U RT/cell) and fixed at 24 h p.i.. Shown is a selection of eight nuclear SNAP.OR3  
323 signals stained with O6-benzylguanine (BG)-SiR for 30 min prior fixation and analyzed by STED nanoscopy. Note that  
324 nuclear background of SNAP.OR3 has been subtracted for clarity. Scale bars: 300 nm.

325

326 **Ultrastructure analysis reveals conical and elongated structures in the position of IN punctae and OR3**  
327 **punctae, respectively.**

328 The findings described above suggest that apparently intact conical HIV-1 capsids can access the  
329 nucleoplasm, where reverse transcription is completed followed by separation of the viral cDNA from the  
330 bulk of viral proteins including CA. To determine the ultrastructure of the observed subviral complexes,  
331 we performed CLEM analysis. For this, we employed a TZM-bl mScarlet.OR3 cell line (Figure 3 — figure  
332 supplement 1d), because the mScarlet fluorescence signal was best retained upon plastic embedding.  
333 Cells were infected with VSV-G pseudotyped NNHIV ANCH carrying IN.SNAP.SiR, thus allowing direct high-  
334 pressure freezing of the sample without pre-fixation. Cells were vitrified at 24 h p.i. and thin sections were  
335 prepared after freeze-substitution and plastic embedding. Samples retained fluorescence for  
336 mScarlet.OR3 and IN.SNAP.SiR. Multi-channel fluorescent Tetraspeck markers were used for correlation  
337 and we identified positions corresponding to mScarlet.OR3 and IN.SNAP.SiR signals, respectively (Figure  
338 5a-c). These positions were imaged using electron tomography (Figure 5d-i). At positions correlating to IN  
339 positive punctae (lacking mScarlet.OR3), we detected cone-shaped structures resembling HIV-1 capsids  
340 (Figure 4e) as well as less defined structures consistent with damaged cones or remnants of capsids (Figure  
341 5g ii, h ii). Electron-dense material most likely corresponding to nucleic acid was visible inside most cone-  
342 shaped structures (Figure 4e and 5i top left panel, black arrowhead), whereas capsid remnant-like  
343 structures mostly lacked interior densities (Figure 5g ii. and Figure 5h ii.). In contrast, tomograms that  
344 correlated to positions of mScarlet.OR3 signals (lacking IN.SNAP.SiR signal) showed no defined conical or  
345 remnant-like structure. Instead, elongated densities were observed (Figure 5g i. and Figure 5h i.), in line  
346 with the findings from STED nanoscopy (see Figure 4f). These structures consisted of linked globular

347 densities (with ~ 30 nm in diameter) resembling the appearance of chromatin, with lengths of ca. 100 nm  
348 (Figure 5h i.). One observed structure spanned 200-300 nm in length (Figure 5g i.).

349 One complex visualized in these experiments correlated to both IN.SNAP.SiR and mScarlet.OR3. The  
350 corresponding tomogram revealed a dense cluster of three capsid-related structures (Figure 5i). One of  
351 these conical structures lacked interior density (Figure 5i, bottom left panel, open arrowhead) and  
352 appeared to be connected with an adjacent elongated density (filled white arrowheads) that appeared to  
353 protrude from the narrow end of the cone (Video 5, Figure 5i right panel). Taken together with the  
354 observations from live cell imaging, we speculate that this structure might represent a subviral complex  
355 captured in the process of or shortly after capsid uncoating.

356

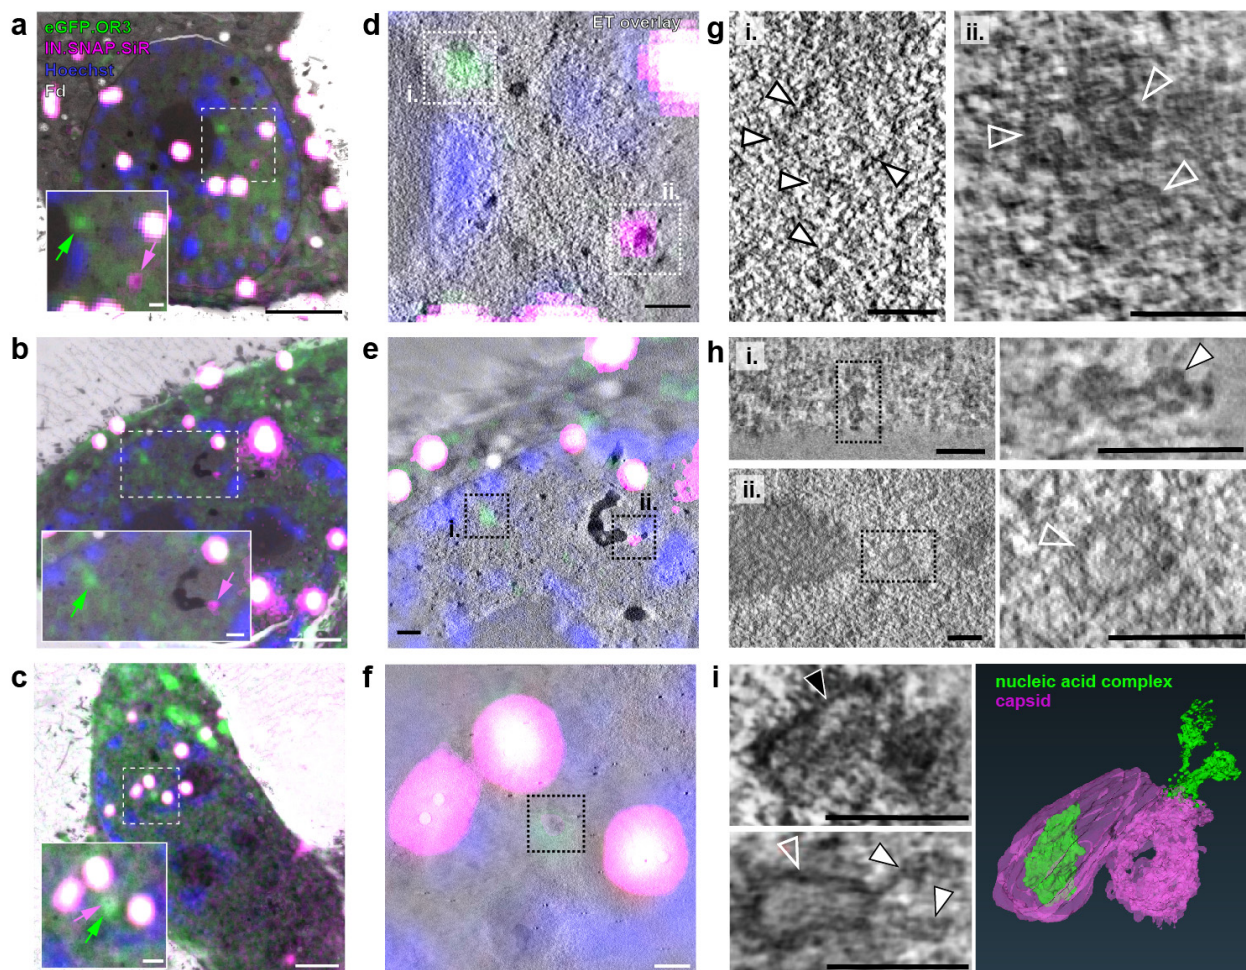

357

358 **Figure 5. CLEM-ET analysis of IN and OR3 punctae inside the nucleus of infected HeLa derived cells.** T2M-bl cells  
359 expressing mScarlet.OR3 were infected with VSV-G pseudotyped and IN.SNAP.SiR-labeled NNHIV ANCH (30  $\mu$ Units  
360 RT/cell). At 24 h p.i., cells were cryo-immobilized by high pressure freezing, freeze substituted and further processed  
361 for CLEM and ET. (a–c) CLEM overlays (with enlargements) of EM sections of cells expressing mScarlet.OR3 (green),

362 infected with NNHIV ANCH IN.SNAP.SiR (magenta), post-stained with Hoechst (blue) and decorated with multi-  
363 fluorescent fiducials (Fd; white) for correlation. Positions of intranuclear spots positive for mScarlet.OR3 (green  
364 arrows) and IN.SNAP.SiR (magenta arrows) are indicated. Enlargements of area in dashed boxes is shown at the  
365 lower left of each panel. (d–f) CLEM-ET overlay of regions enlarged in (a–c). (g–i) Computational slices from  
366 tomographic reconstructions at the correlated positions boxed in (d–f). (g) Left, white arrowheads point to a  
367 filamentous structure corresponding to an mScarlet.OR3 (and IN.SNAP negative) spot boxed in (d; i.). Right, open  
368 white arrowheads indicate three capsid-reminiscent structures correlating to the IN.SNAP.SiR spot boxed in (d, ii.).  
369 (h) Top panels show a chromatin-like density, consisting of apparently linked globular structures, correlating to the  
370 mScarlet.OR3 positive and IN.SNAP.SiR negative spot boxed in (e; i.). Lower panels show the morphology of an empty  
371 open structure correlating to the IN.SNAP.SiR positive, mScarlet.OR3 negative spot boxed in (e; ii.). (i) Morphology  
372 of structures clustering at the position indicated by co-localizing mScarlet.OR3 and IN.SNAP.SiR spots boxed in (f).  
373 Top left, black arrowhead indicates an apparently intact capsid with density inside the cone. Bottom left, the open  
374 white arrowhead indicates an apparently empty cone-like structure. Note an elongated density (filled white  
375 arrowhead) protruding from the narrow end of the cone. The right panel shows the segmented and isosurface  
376 rendered structures shown on the left. See Video 5. Scale bars: 2.5  $\mu\text{m}$  for overviews (a–c), 500 nm for enlargements  
377 (a–c), 250 nm (d–f), and 100 nm (g–i).

378

### 379 **Nuclear CA and segregation of HIV-1 cDNA from the bulk of viral proteins are also observed in HIV-1** 380 **infected primary CD4<sup>+</sup> T cells and monocyte-derived macrophages**

381 In order to validate our findings in more relevant cell types, we adapted the system to the T cell line SupT1  
382 and to primary CD4<sup>+</sup> T cells and primary monocyte-derived macrophages (MDM). Of note, nuclear CA  
383 immunofluorescence signals have been detected previously in MDM (Bejarano et al., 2019), but not or  
384 only weakly in T cell lines (Zila et al., 2019) or primary T cells. Infection of an eGFP.OR3 expressing SupT1  
385 cell line (Figure 6 — figure supplement 1) or of primary activated CD4<sup>+</sup> T cells transduced to express  
386 eGFP.OR3 (Figure 6a) with NNHIV ANCH showed nuclear OR3 punctae and separation of IN-FP and OR3  
387 punctae as observed for TZM-bl cells. In accordance with previous observations (Zila et al., 2019), no or  
388 weak CA signals were detected co-localizing with IN.SNAP foci in T cells (Figure 6a), even after applying  
389 methanol extraction. However, very strong signals for CPSF6, which binds to the hexameric CA lattice  
390 (Price et al., 2012), were detected at positions of the IN-FP (Figure 6b top panel). This observation led us  
391 to speculate that the underlying capsid lattice is masked by the dense coat of CPSF6 in these cells and is  
392 thus not accessible to antibody detection.

393 This hypothesis was tested by treating infected cells with the small molecule PF74, which acts as a  
394 competitive inhibitor of CA-CPSF6 interaction (Bejarano et al., 2019) and may thus displace CPSF6 from  
395 the subviral complex. CD4<sup>+</sup> T cells infected with NNHIV ANCH for 5 h or 22 h were treated with PF74 or  
396 solvent for 2 h before fixation and IF staining (Figure 6b-d). The CPSF6 signal was completely lost from  
397 nuclear HIV-1 subviral complexes upon PF74 treatment at both time points, while IN-FP punctae stayed

398 intact (Figure 6b, lower panel, c). PF74-mediated removal of CPSF6 from the nuclear subviral complex also  
399 revealed a strong CA IF signal, which was absent in solvent treated cells (Figure 6e). No difference was  
400 observed for CA IF signals on extracellular particles and on cytoplasmic or nuclear envelope-associated  
401 subviral complexes upon PF74 treatment, while the nuclear CA signal became strongly enhanced (Figure  
402 6f, g). Thus, the failure to detect nuclear CA by IF in CD4<sup>+</sup> T cells is due to shielding of epitopes by the  
403 accumulation of CPSF6 and not due to CA being lost upon nuclear entry in these cells. Compared to  
404 extracellular virions, subviral particles in the cytosol and at the nuclear envelope displayed a reduced CA  
405 signal due to loss of free CA molecules from the post-fusion complex. This phenotype was most notable  
406 for nuclear envelope associated complexes at later time points whose CA signal corresponded to ~ 50 %  
407 of that of complete particles (Figure 6g). Of note, nuclear subviral complexes showed a higher mean  
408 average CA signal compared to complete virions, supporting nuclear clustering of CA containing  
409 complexes; this was most evident at earlier time points (Figure 6f, g). After PF74 treatment we could also  
410 observe some nuclear eGFP.OR3 punctae representing HIV-1 cDNA that were associated with IN-FP and  
411 clearly CA positive, with a strong signal (Figure 6h). Upon separation from eGFP.OR3 punctae, CPSF6  
412 clusters remained associated with the IN-FP, confirming that the viral cDNA separates from an IN-  
413 FP/CA/CPSF6 positive nuclear structure in the nucleus of infected primary CD4<sup>+</sup> T cells as well (Figure 6i).  
414 Finally, we adapted the ANCHOR system to primary MDM by transducing these cells with an eGFP.OR3  
415 expressing lentiviral vector. Three days post transduction, MDM were infected with VSV-G pseudotyped  
416 NNHIV ANCH containing IN.mScarlet for 24 h. A similar phenotype as shown above for TZM-bl cells and  
417 primary CD4<sup>+</sup> T cells was observed in MDM: the majority of eGFP.O3 punctae was detected separated  
418 from, but often in close vicinity of IN.mScarlet punctae (Figure 6j).  
419



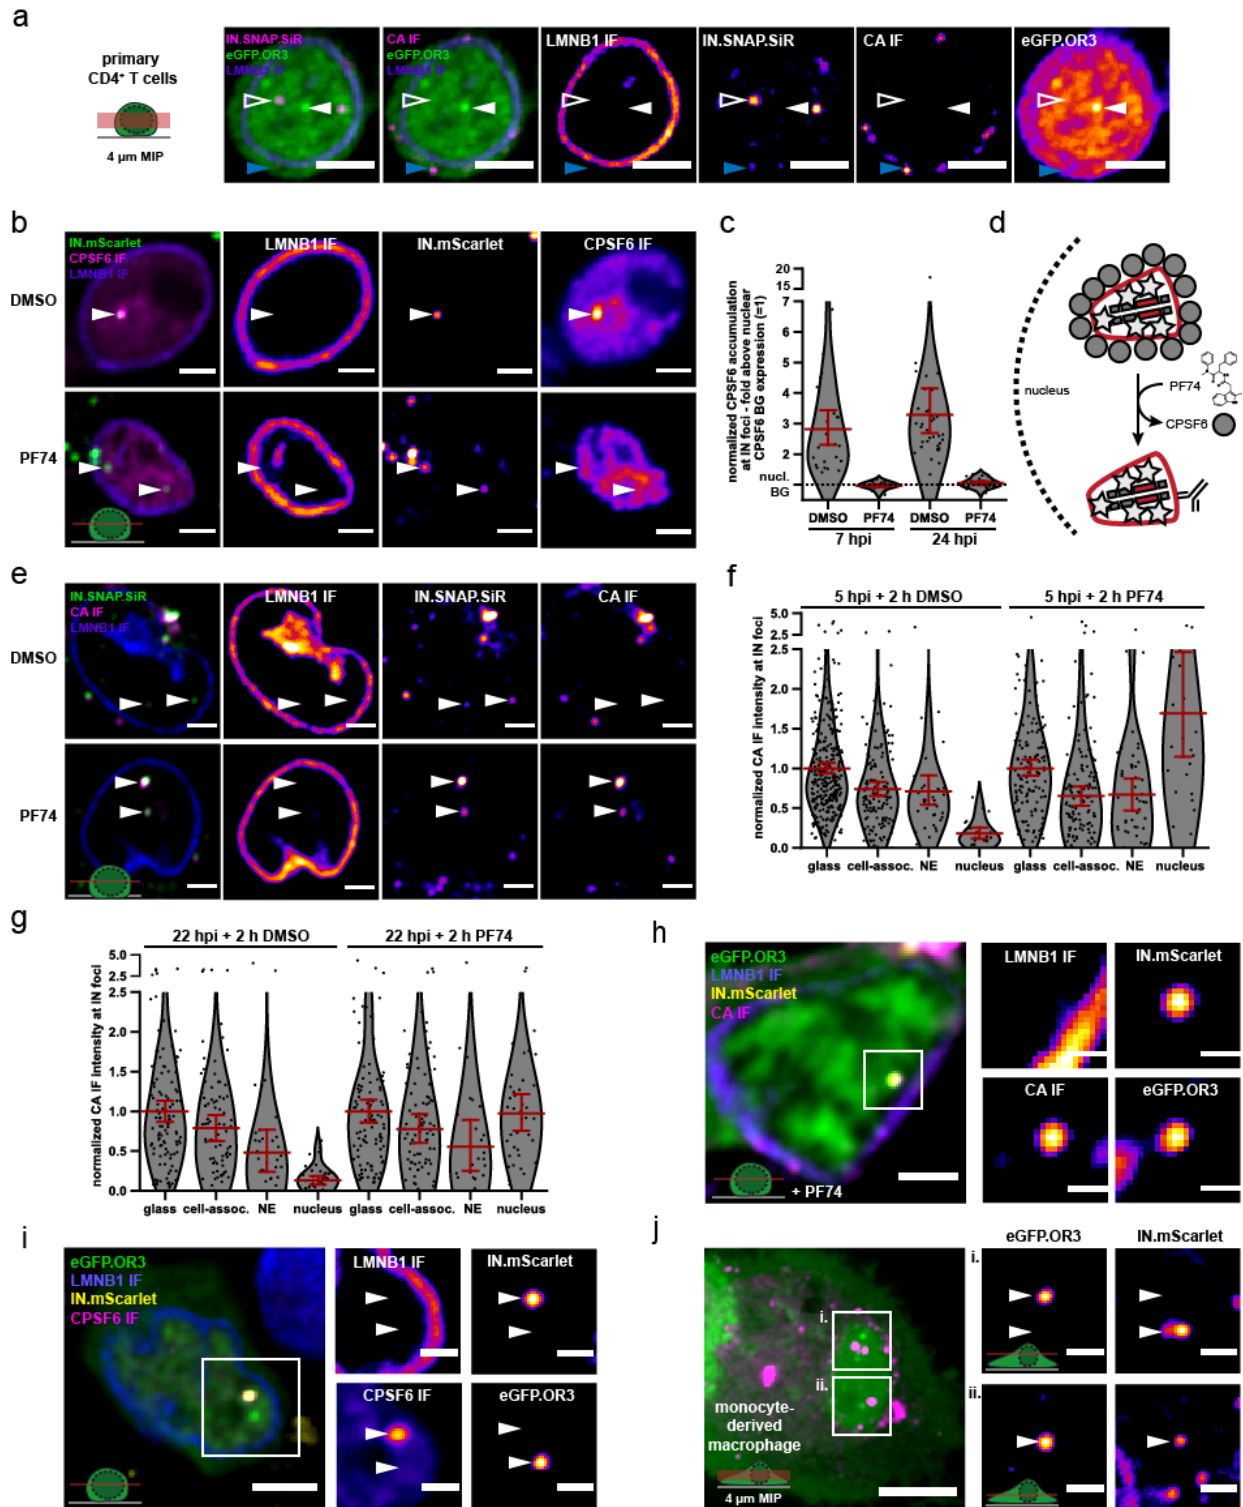

420

421 **Figure 6 HIV DNA separates from IN/CA/CPSF6 positive structures in primary CD4<sup>+</sup> T cells and MDM.** (a) Activated  
 422 CD4<sup>+</sup> T cells were transduced with a lentiviral vector expressing eGFP.OR3. After 48 h, cells were infected using VSV-  
 423 G pseudotyped NNHIV ANCH labelled with IN.SNAP.SiR (30 μM RT/cell) for 24 h before fixation and methanol  
 424 extraction (as in Figure 4a-b). Arrowheads indicate the positions of a nuclear (left, open white) and cytoplasmic  
 425 (bottom, blue) IN.SNAP particle as well as a nuclear eGFP.OR3 focus (right, filled white). A representative image of

426 one of three independent experiments is shown. Scale bars: 5  $\mu\text{m}$ . **(b-g)** Addition of PF74 (15  $\mu\text{M}$ ) after nuclear  
427 import enables immuno-detection of strong CA signals in CD4<sup>+</sup> T cells. Activated primary CD4<sup>+</sup> T cells were infected  
428 using VSV-G pseudotyped NNHIV ANCH IN.mScarlet or IN.SNAP.SiR (30  $\mu\text{U}$  RT/cell). PF74 or DMSO was added after  
429 5 or 22 h for another 2 h prior to fixation and methanol extraction. Shown is one of two independent experiments  
430 performed with cells from three different blood donors. **(b)** PF74 displaces CPSF6 from IN spots. Shown are single z  
431 slices from cells fixed at 24 h p.i. and immunostained for CPSF6. Scale bars: 3  $\mu\text{m}$  **(c)** Quantification of CPSF6 intensity  
432 at IN spots. IN objects were segmented in 3D data sets. The CPSF6 mean intensity of these volumes was quantified  
433 as described in materials and methods. Dots represent single subviral complexes and error bars represent 95 % CI.  
434 **(d)** Scheme visualizing PF74-mediated displacement of CPSF6. **(e)** PF74 enables CA IF detection at IN spots. Shown  
435 are single z slices from cells fixed at 24 h p.i. and immunostained for HIV-1 CA. Scale bars: 3  $\mu\text{m}$ . **(f,g)** Quantification  
436 of CA intensities at IN spots at 7 h **(f)** and 24 h **(g)** p.i.. IN positive objects were segmented in 3D. The CA mean  
437 intensity of these volumes was quantified and normalized to the CA intensity of IN positive objects located on glass  
438 inside the same field of view. Error bars represent 95 % CI. P values of differences between DMSO and PF74  
439 treatments (two-tailed Student's t-test): (glass = 1.000 **(f)**, not significant (ns)), 1.000 **(g)**, ns); cell-assoc. = 0.2684 **(f)**,  
440 ns), 0.9427 **(g)**, ns); NE = 0.7884 **(f)**, ns), 0.7514 **(g)**, ns); nucleus = < 0.0001 **(f)**, significant), < 0.0001 **(g)**, significant). **(h)**  
441 CA positive structure colocalizing with IN and vDNA markers inside the nucleus of CD4<sup>+</sup> T cells. PF74 was added for  
442 2 h prior to fixation at 24 h p.i.. Nuclear background of OR3 was subtracted in enlargements for clarity (in **h-j**). Shown  
443 is a single z slice, scale bars: 5  $\mu\text{m}$  (overview) and 1  $\mu\text{m}$  (enlargement). **(i)** CPSF6 remains colocalized with the IN  
444 signal. Shown is a single z slice, scale bars: 5  $\mu\text{m}$  (overview) and 2  $\mu\text{m}$  (enlargement). **(j)** MDM were transduced using  
445 a Vpx containing eGFP.OR3 expressing lentiviral vector. After 72 h cells were infected using VSV-G pseudotyped  
446 NNHIV IN.mScarlet (120  $\mu\text{U}$  RT/cell), fixed and imaged at 24 h p.i.. Shown is a 4  $\mu\text{m}$  maximum intensity projection.  
447 Scale bar: 5  $\mu\text{m}$ . Enlargements represent a single z slice; scale bars: 2  $\mu\text{m}$ .

448

## 449 Discussion

450 In this study, we adapted a single molecule labeling method to study the dynamics of HIV-1 cDNA in living  
451 cells. Using this system, we showed that the HIV-1 ANCH dsDNA recognizing OR3 marker is only recruited  
452 to the viral cDNA inside the nucleus, while no OR3 punctae were observed associated with viral structures  
453 in the cytosol despite the presence of abundant reverse transcription products. Both, integrated and  
454 unintegrated HIV-1 cDNA were detected by OR3 in the nucleus. Metabolic labeling of nascent DNA  
455 revealed that nuclear eGFP.OR3 punctae contained significantly higher DNA amounts compared to  
456 cytoplasmic or nuclear subviral complexes lacking the eGFP.OR3 signal. Together with recent reports  
457 employing indirect RT inhibitor time-of-addition assays, which showed that reverse transcription remains  
458 sensitive to inhibition until after nuclear import (Burdick et al., 2020; Dharan et al., 2020), and an elegant  
459 experiment showing that positive and negative strand-specific HIV DNA hybridisation probes only co-  
460 localize inside the nucleus (Dharan et al., 2020), our data support completion of HIV-1 reverse  
461 transcription in the nucleus. Furthermore, HIV-1 cDNA separated from an IN fusion protein (IN-FP), often  
462 used as a marker for the HIV-1 replication complex, inside the nucleus; IN fusions are thus not suitable for  
463 tracking HIV-1 cDNA in the nucleus. We expect that unfused IN, also present in the replication complex,  
464 will remain – at least partially – with the cDNA to mediate chromosomal integration and thus separates  
465 from the bulk of IN-FP. Nuclear IN-FP punctae were strongly positive for the viral CA protein and CA, CPSF6  
466 and IN-FP signals stayed together after separation from the viral cDNA.

467 OR3 recruitment to the HIV-1 cDNA requires the dsDNA to be accessible to the 66 kDa eGFP.OR3 fusion  
468 protein, which depends on loss of integrity of the capsid shell. CA signal intensity on nuclear IN-FP positive  
469 and eGFP.OR3-negative structures was equal to or higher than observed for cytoplasmic complexes,  
470 suggesting that the bulk of CA stays associated with the viral replication complex and the viral DNA  
471 remains encased inside a closed capsid or capsid-like structure until after nuclear entry. Using CLEM-  
472 tomography of IN-positive and eGFP.OR3-negative nuclear complexes, we observed morphologically  
473 intact cone-shaped structures with internal density representing the nucleoprotein complex, which  
474 closely resembled HIV-1 capsids inside the cytosol or in complete virions. This finding is consistent with  
475 our recent study showing that the nuclear pore channel is sufficiently large to accommodate the HIV-1  
476 core and apparently intact cone-shaped HIV-1 capsids can enter the nucleus through intact nuclear pores  
477 (Zila et al., 2020). Taken together, these results indicate that reverse transcription initiates in the  
478 cytoplasm inside a complete or largely complete capsid, and this capsid-encased complex trafficks into  
479 the nucleus, where reverse transcription is completed; subsequently it must be uncoated for integration

480 to occur. Formation of eGFP.OR3 punctae requires both, completion of reverse transcription and – at least  
481 partial – uncoating, and these two events may conceivably occur in a coordinated manner.

482 IN-FP (and CA) positive nuclear complexes at later time points were often observed in close vicinity but  
483 clearly separated from eGFP.OR3 punctae, and live cell microscopy confirmed separation of the two  
484 markers from a single focus over time. Both markers retained their focal appearance and could thus be  
485 analysed by CLEM. Electron tomography of late IN-FP positive complexes revealed electron-dense  
486 structures that resembled broken HIV-1 capsids or capsid-like remnants lacking the density of the  
487 nucleoprotein complex. In contrast, eGFP.OR3-positive and IN-negative nuclear subviral structures never  
488 exhibited an electron-dense lining resembling the capsid shell, and these complexes were always negative  
489 for CA by immunofluorescence. These results indicate that viral cDNA associated with some replication  
490 proteins emanates from the broken capsid, which retains the bulk of CA and capsid-associated proteins.  
491 Uncoating therefore does not appear to occur by cooperative disassembly of the CA lattice, but by  
492 physically breaking the capsid shell and loss of irregular capsid segments. We often observed clustering  
493 of capsids or capsid-remnants inside the nucleus indicating preferred trafficking routes of subviral  
494 complexes.

495 The broken capsid-remnant structures inside the nucleus of infected cells closely resembled ruptured HIV-  
496 1 cores observed in a recent study analyzing HIV-1 cDNA formation and integration in an *in vitro* system  
497 using purified viral cores (Christensen et al., 2020). These authors reported partially broken capsid shells  
498 with irregular defects at time points when endogenous cDNA formation was largely completed; they also  
499 detected polynucleotide loops emanating from the holes in the capsid lattice. Theoretical models and  
500 AFM-studies had suggested that the volume of double-stranded HIV-1 b-DNA cannot be accommodated  
501 inside the intact capsid and that the resulting pressure might mechanically trigger uncoating (Rankovic et  
502 al., 2017; Rouzina & Bruinsma, 2014). Taken together, these results suggest that the growing dsDNA inside  
503 the viral capsid in the nucleus may eventually lead to local rupture of the capsid lattice, concomitantly  
504 allowing completion of reverse transcription and triggering uncoating of the proviral DNA. It must be kept  
505 in mind, however, that lentiviral vectors with much shorter length of the vector RNA efficiently transduce  
506 cells, and this will need to be analyzed in future studies. Nuclear import is not required for completion of  
507 cDNA synthesis and loss of capsid integrity since similar structures were detected in the *in vitro* system  
508 (Christensen et al., 2020). The observation that the viral cDNA was not fully released from the viral core  
509 *in vitro* suggests, however, that the nuclear environment may play a role in this process. The described  
510 pathway appears to be conserved in HeLa reporter cells and primary HIV-1 sensitive CD4<sup>+</sup> T-cells and

511 MDM: separation of IN/CA complexes from the OR3-positive cDNA inside the nucleus of infected cells was  
512 observed in all cell types, and the IN-positive subviral complexes exhibited a strong CA signal in all cases.  
513 Previous failure to detect CA on nuclear complexes in T cells has been due to epitope masking by the  
514 cellular CPSF6 protein and the current results thus indicate a common pathway for early HIV-1 replication  
515 in different cell types including primary target cells of HIV-1 infection.

516 STED and CLEM analysis revealed elongated structures with regularly spaced globular densities at the  
517 position of eGFP.OR3-positive punctae that had separated from the IN fusion protein and CA. These  
518 structures resembled chromatinized DNA (Miron et al., 2020), in line with biochemical evidence that HIV-  
519 1 cDNA is rapidly chromatinized when it becomes accessible to the nucleoplasm (Geis & Goff, 2019).  
520 Detection of a cone-shaped structure lacking the electron-dense internal nucleoprotein signal and directly  
521 associated with an elongated chromatin-like structure at a position that was positive for both IN-FP and  
522 eGFP.OR3 may have captured a subviral complex in the process of uncoating. We suggest that  
523 chromatinization of HIV-1 cDNA emerging from the broken capsid may facilitate complete uncoating of  
524 the genome, which could explain why viral cDNA remained largely associated with the capsid structure in  
525 the *in vitro* system.

526 In conclusion, our results indicate that complete or largely complete HIV-1 capsids enter the nucleus of  
527 infected cells, where reverse transcription is completed and the viral cDNA genome is released by physical  
528 disruption rather than by cooperative disassembly of the capsid lattice (Figure 7). The viral capsid thus  
529 plays an active role in the entire early phase of HIV-1 replication up to chromosomal integration and  
530 appears to be important for cytoplasmic trafficking, reverse transcription, shielding of viral nucleic acid  
531 from the innate immune system, nuclear entry and intranuclear trafficking. The cone-shaped HIV-1 capsid  
532 with its fullerene geometry thus is the key orchestrator of early HIV-1 replication.

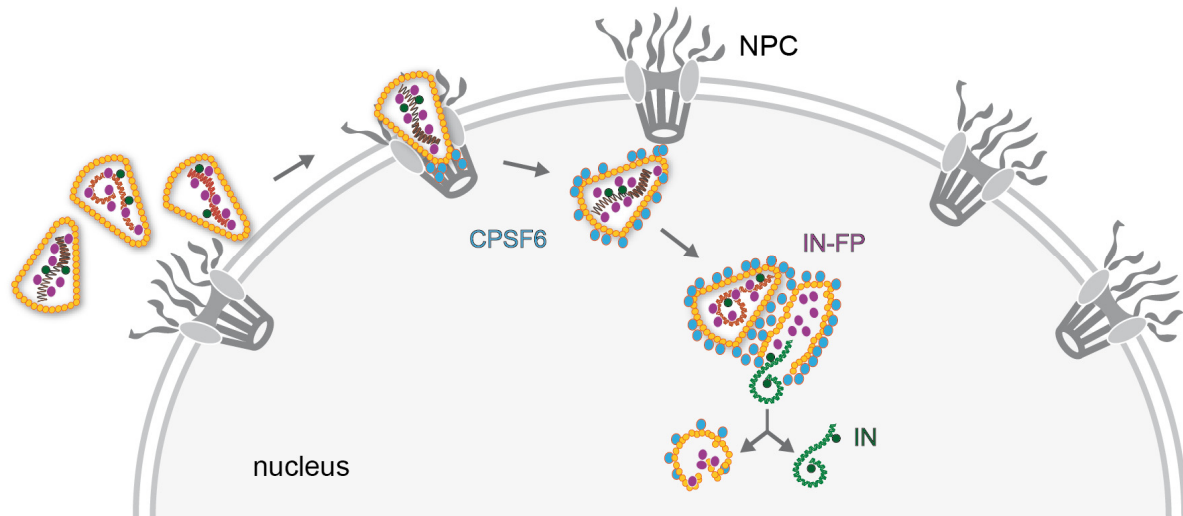

533

534 **Figure 7 Model of HIV-1 nuclear entry and uncoating.** Apparently intact HIV capsids are imported into the nucleus through  
535 nuclear pore complexes (NPC) retaining their cone-shaped morphology. CPSF6 releases the cores from the NPC and clusters on  
536 nuclear capsids. Multiple capsids accumulate at certain positions within the nucleus, and plus strand synthesis of the viral double-  
537 stranded cDNA is completed in the nucleus. Physical disruption of the capsid releases the completed cDNA into the nucleoplasm,  
538 where it becomes integrated into the host cell genome in the vicinity of the uncoating site. Empty remnants of the broken capsid,  
539 associated with incorporated viral proteins that are not part of the cDNA complex, remain as distinct structures in the nucleus  
540 for prolonged times after uncoating.

541

## 542 Materials and Methods

### 543 Key resources table

| Reagent type (species) or resource | Designation                                              | Source or reference                          | Identifiers      | Additional information                                                    |
|------------------------------------|----------------------------------------------------------|----------------------------------------------|------------------|---------------------------------------------------------------------------|
| Antibody                           | Rabbit polyclonal anti-HIV-1 CA                          | In-house                                     | -                | 1:1000 IF                                                                 |
| Antibody                           | Rabbit polyclonal anti-hCPSF6                            | Atlas Antibodies; Cat# HPA039973             | RRID:AB_10795242 | 1:500 IF                                                                  |
| Antibody                           | Mouse monoclonal anti-hLamin A/C                         | Santa Cruz Biotech.; Cat# sc-7292            | RRID:AB_627875   | 1:100 IF; works for HeLa cells and MDM                                    |
| Antibody                           | Mouse monoclonal anti hLaminB1                           | Santa Cruz Biotech.; Cat# sc-365962          | -                | 1:200 IF; works for SupT1 and primary CD4 <sup>+</sup> T cells            |
| Antibody                           | Alexa Fluor (405, 488, 568 and 647) secondary antibodies | Thermo Fisher Scientific                     | -                | 1:1000 IF                                                                 |
| Antibody                           | Goat anti-rabbit IgG Atto 594                            | Sigma Aldrich; Cat# 77671                    | -                | 1:500 IF (STED)                                                           |
| Cell line ( <i>H. sapiens</i> )    | Hela TZM-bl                                              | (Wei et al., 2002)                           | RRID:CVCL_B478   | -                                                                         |
| Cell line ( <i>H. sapiens</i> )    | Embryonic kidney 293 T cells (HEK293T)                   | (Pear et al., 1993)                          | RRID:CVCL_0063   | -                                                                         |
| Cell line ( <i>H. sapiens</i> )    | T cell line SupT1                                        | (Smith et al., 1984)                         | RRID:CVCL_1714   | -                                                                         |
| Cell line ( <i>H. sapiens</i> )    | TZM-bl eGFP.OR3 IRES puro                                | This study                                   | -                | -                                                                         |
| Cell line ( <i>H. sapiens</i> )    | TZM-bl mScarlet.OR3 IRES puro                            | This study                                   | -                | -                                                                         |
| Cell line ( <i>H. sapiens</i> )    | TZM-bl SNAP.OR3 IRES puro                                | This study                                   | -                | -                                                                         |
| Cell line ( <i>H. sapiens</i> )    | TZM-bl eBFP2.LMNB1 IRES BLR                              | This study                                   | -                | -                                                                         |
| Cell line ( <i>H. sapiens</i> )    | TZM-bl eBFP2.LMNB1 IRES BLR eGFP.OR3 IRES puro           | This study                                   | -                | -                                                                         |
| Cell line ( <i>H. sapiens</i> )    | SupT1 eGFP.OR3 IRES puro                                 | This study                                   | -                | -                                                                         |
| plasmid                            | pWPI eGFP.OR3 IRES puro                                  | This study                                   | -                | -                                                                         |
| plasmid                            | pWPI mScarlet.OR3 IRES puro                              | This study                                   | -                | -                                                                         |
| plasmid                            | pWPI SNAP.OR3 IRES puro                                  | This study                                   | -                | -                                                                         |
| plasmid                            | pWPI eBFP2.LMNB1 IRES BLR                                | This study                                   | -                | -                                                                         |
| plasmid                            | pWPI ANCH3 IRES puro                                     | This study                                   | -                | -                                                                         |
| plasmid                            | NNHIV env(s) ANCH                                        | This study                                   | -                | Integration/transcription deficient HIV-1 proviral plasmid harboring ANCH |
| plasmid                            | NLC4-3 env(s) ANCH                                       | This study                                   | -                | HIV-1 proviral plasmid harboring ANCH                                     |
| plasmid                            | Vpr-IN.SNAP                                              | This study                                   | -                | Expression of labelled IN                                                 |
| plasmid                            | Vpr-IN <sub>D64N/D116N</sub> .SNAP                       | This study                                   | -                | Expression of labelled IN                                                 |
| plasmid                            | Vpr-IN.eGFP                                              | (Albanese et al., 2008)                      | -                | Expression of labelled IN                                                 |
| plasmid                            | Vpr-IN <sub>D64N/D116N</sub> .eGFP                       | D. Bejarano (University Hospital Heidelberg) | -                | Expression of labelled IN                                                 |

|                         |                                          |                                            |                    |                                         |
|-------------------------|------------------------------------------|--------------------------------------------|--------------------|-----------------------------------------|
| plasmid                 | Vpr-IN.mScarlet                          | (Zila et al., 2020)                        | -                  | Expression of labelled IN               |
| plasmid                 | Vpr-IN <sub>D64N/D116N</sub> .mScarlet   | (Zila et al., 2020)                        | -                  | Expression of labelled IN               |
| plasmid                 | psPAX2                                   | D. Trono (EPFL, Lausanne, Switzerland)     | RRID:Addgene_35002 | Lentiviral packaging vector             |
| plasmid                 | pCMV-VSV-G                               | B. Weinberg (Whitehead Institute, MA, USA) | RRID:Addgene_8454  | Expression of VSV-G                     |
| plasmid                 | ANCHOR system                            | NeoVirTech (France)                        | -                  | www.neovirtech.com                      |
| Commercial assay or kit | Click-iT Edu Alexa Fluor 647 Imaging kit | Thermo Fisher Scientific; Cat#C10340       | -                  | -                                       |
| Commercial assay or kit | InviTrap Spin Universal RNA Mini kit     | Stratec; Cat#1060100300                    | -                  | -                                       |
| Software, algorithm     | Fiji 1.53c                               | (Schindelin et al., 2012)                  | RRID:SCR_002285    | General image analysis                  |
| Software, algorithm     | Icy 2.0.3.0                              | (de Chaumont et al., 2012)                 | RRID:SCR_010587    | Intensity quantification, Correlation   |
| Software, algorithm     | Imspector 16.1.6905                      | Abberior Instruments (Germany)             | RRID:SCR_015249    | STED data acquisition and deconvolution |
| Software, algorithm     | Prism 5.01                               | GraphPad Software Inc. (CA, United States) | RRID:SCR_002798    | Visualization and Plotting              |
| Software, algorithm     | Matplotlib 3.1.3                         | (Hunter, 2007)                             | RRID: SCR_008624   | Visualization and Plotting              |
| Software, algorithm     | Seaborn 0.10.0                           | (Michael Waskom et al., 2020)              | RRID:SCR_018132    | Visualization and Plotting              |
| Software, algorithm     | CSBdeep 0.4.1                            | (Weigert et al., 2018)                     | -                  | Content-aware image restoration         |
| Software, algorithm     | Volocity 6.3                             | Perkin Elmer (United States)               | RRID:SCR_002668    | Data acquisition                        |
| Software, algorithm     | IMOD 4.9.4                               | (Kremer et al., 1996)                      | RRID:SCR_003297    | Tomogram Reconstruction                 |
| Software, algorithm     | SerialEM 3.7.9                           | (Mastronarde, 2005)                        | RRID:SCR_017293    | Tomogram acquisition, pre-correlation   |
| Software, algorithm     | ec-CLEM (Icy plugin) 1.0.1.5             | (Paul-Gilloteaux et al., 2017)             | -                  | Correlation                             |
| Software, algorithm     | Amira-Avizo Software 2019.3              | Thermo Fisher Scientific                   | -                  | Visualization and rendering             |

544

545 **List of primers**

| primer                          | sequence                                              |
|---------------------------------|-------------------------------------------------------|
| Linearize NL4-3/NNHIV fw        | CAGTTTTAATTGTGGAGGGG                                  |
| Linearize NL4-3/NNHIV rv        | ttaAGGTACCCATAATAGAC                                  |
| SNAP_Bam_fw                     | ccgcggggatccagggatggacaaagactgcgaaatg                 |
| SNAP_Not_rv                     | gccgccgcgccgctttacagcccaggcttgcccagctt                |
| eBFP2-LMNB1-10 into pWPI_BLR fw | tttcgatcacgagactagcctcgaggttGCCACCATGGTGAGCAAG        |
| eBFP2-LMNB1-10 into pWPI_BLR rv | tttactagtagcgtgcatgccccggggCTACATAATTGCACAGCTTCTATTGG |
| U1a Fwd primer                  | ACATCAAGCAGCCATGCAAAA                                 |
| U1a Rev primer                  | CAGAATGGGATAGATTGCATCCA                               |
| U1a probe                       | AAGAGACCATCAATGAGGAA                                  |
| Nuc1b Fwd primer                | CGTCTGTTGTGACTCTGGTAACT                               |
| Nuc1b Rev primer                | CACTGCTAGACATTTCCACACTGA                              |
| Nuc1b probe                     | ATCCCTCAGACCCTTT                                      |



|                                      |                                           |
|--------------------------------------|-------------------------------------------|
| AluI (first round Alu PCR)           | TCCCAGCTACTGGGGAGGCTGAGG                  |
| LM667 (first round Alu PCR)          | ATGCCACGTAAGCGAACTCTGGCTAACTAGGGAACCCACTG |
| λT (second round Alu qPCR)           | ATGCCACGTAAGCGAACT                        |
| LR (second round Alu qPCR)           | TCCACACTGACTAAAAGGGTCTGA                  |
| ZXF-P (probe; second round Alu qPCR) | TGTGACTCTGGTAACTAGAGATCCCTCAGACCC         |

## 546 **Plasmids**

547 Plasmids were cloned using standard molecular biology techniques and verified by commercial Sanger  
548 sequencing (Eurofins Genomics, Germany). Gibson assembly was performed using the NEB HiFi Mastermix  
549 (New England Biolabs, USA) and 30 bp overlap regions. PCR was performed using Q5 High-Fidelity DNA  
550 Polymerase (New England Biolabs) according to manufacturer's instructions with primers purchased from  
551 Eurofins Genomics. *E. coli* DH5α and Stbl2 (Trinh et al., 1994, p. 2) (Thermo Fisher Scientific, USA) were  
552 used for amplification of standard plasmids or LTR containing plasmids, respectively.

### 553 *Derivatives of pNL4-3 and pNNHIV harboring ANCH1000 within the env gene*

554 To facilitate the cloning procedure, EcoRI/XhoI fragments comprising the env region of HIV were  
555 subcloned from pNLC4-3 (Bohne & Kräusslich, 2004) and its non-replication competent derivative pNNHIV  
556 (Zila et al., 2020) into pcDNA3.1<sup>(+)</sup> (Thermo Fisher Scientific). These constructs were PCR linearized,  
557 deleting a ~ 1000 bp region (nt 130-1113) within the env coding sequence. The ANCH3 1000 bp sequence  
558 was PCR amplified from pANCH3 (NeoVirTech, France), introducing a stop codon directly upstream of  
559 ANCH3, and transferred into the linearized vector fragments using Gibson assembly. The modified  
560 fragments were transferred into pNL4-3 or pNNHIV backbones using EcoRI/XhoI.

### 561 *Vpr-IN.SNAP and Vpr-IN<sub>D64N/D116N</sub>.SNAP*

562 The SNAP-tag gene was PCR amplified from pSNAP-tag(m) (Addgene #101135) and cloned into pVpr-  
563 IN.eGFP(Albanese et al., 2008) using BamHI/NotI, substituting the eGFP gene for the SNAP-tag coding  
564 region. To generate the Vpr-IN<sub>D64N/D116N</sub>.SNAP mutant, the IN<sub>D64N/D116N</sub> from Vpr-IN<sub>D64N/D116N</sub>.eGFP (gift from  
565 D. A. Bejarano) was cloned into Vpr-IN.SNAP using BamHI/NotI.

### 566 *Lentiviral transfer vectors harboring the ANCH sequence and eGFP.OR3, SNAP.OR3, mScarlet.OR3 and eBFP2.LMNB1 coding sequences*

567 The ANCH3 1000 bp sequence was PCR amplified from pANCH3 (NeoVirTech) and cloned by Gibson  
568 assembly into pWPI IRES puro (Trotard et al., 2016) linearized with NotI. The eGFP.OR3 gene was PCR  
569 amplified from peGFP-OR3 (NeoVirTech) and transferred via Gibson assembly into PmeI/BamHI linearized  
570 pWPI IRES puro to create the expression cassette EF1-alpha eGFP.OR3 IRES puro. The SNAP gene was  
571 amplified from pVpr.IN.SNAP and the mScarlet (WT) (Bindels et al., 2016) gene from the mScarlet C1  
572

573 vector (Addgene #85042) and placed N-terminal to OR3 into PCR linearized pWPI EF1-alpha OR3 IRES puro  
574 backbone by Gibson assembly, substituting eGFP. The eBFP2.LMNB1 gene was amplified from pEBFP2-  
575 LaminB1-10 (Addgene #55244) and transferred via Gibson assembly into PmeI/BamHI linearized pWPI  
576 IRES BLR (Trotard et al., 2016).

577

## 578 **Cell culture**

579 HEK293T (Pear et al., 1993) (RRID: [CVCL\\_0063](#)), HeLa TZM-bl (Wei et al., 2002) (RRID: [CVCL\\_B478](#)) and  
580 SupT1 (Smith et al., 1984) (RRID: [CVCL\\_1714](#)) cell lines were authenticated using STR profiling (Eurofins  
581 Genomics) and monitored for mycoplasma contamination using the MycoAlert mycoplasma detection kit  
582 (Lonza Rockland, USA). Cells were cultured at 37 °C and 5 % CO<sub>2</sub> in Dulbecco's Modified Eagle's Medium  
583 (DMEM; Thermo Fisher Scientific) containing 4.5 g l<sup>-1</sup> D-glucose and L-glutamine supplemented with 10 %  
584 fetal calf serum (FCS; Sigma Aldrich, USA), 100 U ml<sup>-1</sup> penicillin and 100 µg ml<sup>-1</sup> streptomycin (PAN Biotech,  
585 Germany) (adherent cell lines) or in RPMI 1640 (Thermo Fisher Scientific) containing L-glutamine  
586 supplemented with 10 % FCS, 100 U ml<sup>-1</sup> penicillin and 100 µg ml<sup>-1</sup> streptomycin (SupT1 cells). Primary  
587 CD4<sup>+</sup> T cells were cultured in RPMI 1640 containing L-glutamine supplemented with 10 % heat-inactivated  
588 FCS, 100 U ml<sup>-1</sup> penicillin and 100 µg ml<sup>-1</sup> streptomycin. Monocyte-derived macrophages (MDM) were  
589 cultured in RPMI 1640 containing 10 % heat-inactivated FCS, 100 U ml<sup>-1</sup> penicillin, 100 µg ml<sup>-1</sup> streptomycin  
590 and 5 % human AB serum (Sigma Aldrich).

591 *Isolation of primary cells.* CD4<sup>+</sup> T cells were enriched from blood of healthy donors using RosetteSep  
592 Human CD4<sup>+</sup> T cell enrichment cocktail (Stemcell Technologies, Canada) according to the manufacturer's  
593 instructions followed by Ficoll density gradient centrifugation. Subsequently, cells were activated using  
594 human T-Activator CD3/CD28 Dynabeads (Thermo Fisher Scientific) and 90 U/ml IL-2 for 48-72 h. MDMs  
595 were isolated from buffy coats of healthy blood donors as described previously (Bejarano et al., 2019).

## 596 **Generation of cell lines**

597 Lentiviral vector particles were produced by co-transfection of packaging plasmid psPAX2 (Addgene  
598 #12260), the respective lentiviral transfer vector pWPI, the envelope expression plasmid pCMV-VSV-G  
599 (Addgene #8454) and pAdvantage (Promega, USA) in a ratio of 1.5 : 1.0 : 0.5 : 0.2 µg into HEK293T cells  
600 (4x10<sup>5</sup> cells/well seeded the day before in 6 well plates) using polyethylenimin (PEI; 3 µl of 1 mg/ml PEI  
601 per µg DNA). At 48 h post transfection the tissue culture supernatant was harvested and filtered through  
602 0.45 µm mixed cellulose ester (MCE) filters. SupT1 (1 ml of freshly 1:4 diluted cells) or TZM-bl (5x10<sup>4</sup>  
603 cells/well seeded the day before in 12 well plates) cells were transduced using 50-500 µl supernatant. At

604 48 h post transduction selection with 1 µg/ml puromycin or 5 µg/ml blasticidin was initiated. For  
605 transduction of MDM, lentiviral vectors were produced with VpX<sub>mac239</sub> (Bejarano et al., 2018) by calcium  
606 phosphate transfection of packaging plasmid pΔR8.9 NSDP (Pertel et al., 2011), containing a Vpx  
607 interaction motif in Gag, pWPI eGFP.OR3 IRES puro, Vpx expression plasmid pcDNA.VpX<sub>mac239</sub> (Sunseri et  
608 al., 2011) and pCMV-VSV-G at a ratio of 1.33 : 1.00 : 0.17 : 0.33 µg (68 µg / T175 flask). MDM were  
609 differentiated in human AB serum (Sigma Aldrich) from monocytes (Bejarano et al., 2019) in 15-well µ-  
610 Slides Angiogenesis (ibidi, Germany) for 10 d and transduction was performed 2 d prior to infection.

### 611 **Production of viral particle stocks**

612 pNLC4-3 or pNNHIV ANCH, a Vpr-IN plasmid (Vpr-(SNAP/eGFP/mScarlet).IN or Vpr-  
613 (SNAP/eGFP/mScarlet).IN<sub>D64N/D116N</sub>) and pCMV-VSV-G or pCAGGS.NL4-3-Xba (Bozek et al., 2012) were  
614 transfected in a ratio of 7.7 : 1.3 : 1.0 µg into HEK293T cells using calcium phosphate (70 µg / T175 flask).  
615 Medium was changed at 6-8 h and cells were further incubated for 48 h. Supernatant was harvested and  
616 filtered through 0.45 µm MCE before ultracentrifugation through a 20 % (w/w) sucrose cushion (2 h,  
617 107.000 g). Pellets were resuspended in phosphate-buffered saline (PBS) containing 10 % FCS and 10 mM  
618 HEPES (pH 7.5), and stored in aliquots at - 80 °C. Virus was quantified using the SYBR Green based Product  
619 Enhanced Reverse Transcription assay (SG-PERT) (Pizzato et al., 2009). MOI of infectious particles was  
620 determined by titration on TZM-bl cells and immunofluorescence staining against HIV CA at 48 h p.i.. The  
621 proportion of positive cells was counted in > 10 randomly selected fields of view.

### 622 **Labeling of SNAP-tagged virus and infection**

623  $3.33 \times 10^3$  TZM-bl cells were seeded into 15-well µ-Slides Angiogenesis (ibidi) the day before infection.  
624 Stock solutions of SNAP-Cell® TMR-Star or SNAP-Cell® 647-SiR (New England Biolabs) in DMSO were  
625 diluted to 4 µM in complete medium, mixed 1:1 with IN.SNAP particles and incubated at 37 °C for 30 min.  
626 Labelled particles were added to cells at 5-30 µUnits RT /cell in 50 µl. For VSV-G pseudotyped pNL4-3  
627 ANCH, 30 µUnits RT per TZM-bl cell corresponds to ~ MOI 6 in TZM-bl cells. Infection of MDM was  
628 performed with NNHIV ANCH (50 µl, 120 µUnits RT/cell). Infection of suspension cells was performed with  
629  $2 \times 10^4$  cells per 15 well µ-Slide in 96 well v-bottom plates (40 µl; 30 µU RT/cell). For PF-3450074 (PF74;  
630 Sigma Aldrich) experiments in primary CD4<sup>+</sup> T cells, medium was changed at 5 or 22 h to medium  
631 containing 15 µM PF74 or DMSO, for 1 h before transfer to PEI coated (with 1 mg/ml PEI for 60 min) µ-  
632 Slides. Slides were incubated for 1 h for cell attachment prior to fixation. Efavirenz (EFV; Sigma Aldrich),  
633 Raltegravir (Ral; AIDS Research and Reference Reagent Program, Division AIDS, NIAID) and Azidothymidine

634 (AZT) were added at time of infection. Flavopiridol (Sigma Aldrich) and 5,6-dichloro-1-beta-D-  
635 ribofuranosylbenzimidazole (DRB; Sigma Aldrich) were added 8 h prior to fixation or RNA extraction. 10  
636  $\mu\text{M}$  EdU (Thermo Fisher Scientific) and 6  $\mu\text{M}$  APC (Sigma Aldrich) were added at the time of infection.

#### 637 **Fixation immunofluorescence staining and EdU click-labeling**

638 Samples were washed with PBS and fixed (15 min, 4 % PFA), washed again three times using PBS,  
639 permeabilized with 0.5 % Triton X-100 (TX-100) for 10 or 20 min and washed again. In indicated  
640 experiments, cells were extracted using ice-cold methanol for 10 min. Afterwards, cells were washed two  
641 times using 3 % bovine serum albumin (BSA)/PBS and blocked for 30 min with 3 % BSA. Primary antibody  
642 in 0.5 % BSA was added for 1 h at room temperature. After washing three times with 3 % BSA/PBS,  
643 secondary antibody in 0.5 % BSA was added for 1 h at room temperature and samples were washed and  
644 stored in PBS. For EdU incorporation experiments, cells were click-labeled for 30 min at room temperature  
645 using the Click-iT EdU-Alexa Fluor 647 Imaging Kit (Thermo Fisher Scientific) according to the  
646 manufacturer's instructions.

#### 647 **DNA fluorescent in situ hybridization (FISH)**

648 Biotinylated HIV-1 FISH probes were prepared with the Nick Translation Kit (Roche, Germany) according  
649 to the manufacturer's instructions. Probes were purified with Illustra Microspin G-25 columns (GE  
650 Healthcare, UK) according to the manufacturer's instructions and ethanol precipitated with human Cot-1  
651 DNA (Roche, Germany) and herring sperm DNA (Sigma Aldrich). Probes were resuspended in 10  $\mu\text{L}$   
652 formamide, incubated at 37 °C for 15-20 min and 10  $\mu\text{L}$  of 20 % dextran/4X saline-sodium citrate (SSC)  
653 buffer was added.

654  $1.25 \times 10^4$  TZM-bl cells/well were seeded on PEI (1 mg/ml) coated glass cover slips and infected with VSV-  
655 G pseudotyped IN.SNAP.SiR labelled NNHIV ANCH (30  $\mu\text{U}/\text{cell}$ ). At 24 h cells were fixed for 10 min with 4  
656 % PFA/PBS, permeabilized with 0.5 % TX-100/0.1 % Tween/PBS for 10 min at room temperature, and  
657 washed in 0.1 % Tween/PBS. Following 30 min blocking in 4 % BSA/PBS, cells were incubated with rabbit  
658 anti-GFP antibody (ab6556; Abcam, UK), diluted (1:2000) in 1 % BSA/PBS overnight at 4 °C. Cells were  
659 washed in 0.1 % Tween/PBS and incubated with secondary Alexa Fluor antibody (Thermo Fisher Scientific)  
660 for 1 h at room temperature. Cells were fixed for 10 min with 0.5 mM ethylene glycol bis(succinimidyl  
661 succinate) (EGS)/PBS, washed in 0.1 % Tween/PBS and permeabilized with 0.5 % TX-100/0.5 %  
662 saponin/PBS for 10 min. Cells were incubated for 45 min in 20 % glycerol/PBS and subjected to four  
663 glycerol/liquid N<sub>2</sub> freeze-thaw cycles. Samples were rinsed, incubated in 0.1 M HCl for 10 min, equilibrated

664 in 2X SSC for 20 min and left in hybridization buffer (50 % Formamide/2X SSC) for 30 min. Samples were  
665 then washed in PBS, treated with 0.01 N HCl/0.002 % pepsin (3 min, 37 °C) and quenched by addition of  
666 1X PBS/1 M MgCl<sub>2</sub>. Fixation with 4 % PFA/PBS and PBS wash was followed by treatment with 100 µg/ml  
667 RNase A (PureLink, Invitrogen, USA) in 2x SSC for 30 min at 37 °C, washing and overnight storage in  
668 hybridization buffer.

669 1-10 µL of heat-denatured FISH probe (7 minutes at 95 °C) was loaded onto glass slides covered with  
670 coverslips coated with prepared cells. Slides were sealed in a metal chamber heated at 80 °C for 7 min,  
671 and incubated for 48 h at 37 °C. Samples were washed in 2X SSC at 37 °C, followed by 3 washes in 0.5 X  
672 SSC at 56 °C. FISH detection was performed using anti-biotin antibody (SA-HRP) and a FITC/Cy5 coupled  
673 secondary antibody with the TSA Plus system (Perkin Elmer, USA). Coverslips were stained with Hoechst,  
674 mounted on glass slides and imaged using the Nikon/Andor SDCM system described below.

### 675 **Confocal microscopy**

676 Spinning disc confocal microscopy (SDCM) was performed on an inverted Nikon Eclipse Ti2 (Nikon, Japan)  
677 microscope equipped with a Yokogawa CSU-W1 Spinning Disk Unit (Andor, Oxford Instruments, United  
678 Kingdom) and an incubation chamber (37 °C, 5 % CO<sub>2</sub>). Imaging was performed using a 100 × oil-immersion  
679 objective (Nikon CFI Apochromat TIRF 100X Oil NA 1.49) and either single or dual channel EMCCD camera  
680 setup (ANDOR iXon DU-888) recording the eBFP2 (405/420-460), eGFP (488/510-540 nm), mScarlet  
681 (568/589-625 nm) and SiR (647/665-705 nm) channels with a pixel size of 0.13 µm. 3D stacks of 10-30  
682 randomly chosen positions were automatically recorded with a z-spacing of 0.3-0.5 µm using the Nikon  
683 Imaging Software Elements v5.02. For CLEM experiments a Perkin Elmer Ultra VIEW VoX 3D spinning disk  
684 confocal microscope (Perkin Elmer, United States) with a 100 x oil immersion objective (NA 1.4; Perkin  
685 Elmer) was used.

### 686 **Live cell imaging**

687 Medium was exchanged for 50 µl imaging medium containing FluoroBrite DMEM (Thermo Fisher  
688 Scientific), 10 % FCS, 4 mM GlutaMAX (Gibco Life Technologies), 2 mM sodium pyruvate (Gibco Life  
689 Technologies), 20 mM HEPES pH 7.4, 100 U/ml Penicillin and 100 µg/ml Streptomycin (PAN-Biotech).  
690 Samples were transferred to the SDCM setup described above. 3D stacks were recorded up to 24 h (time  
691 interval of 3-30 min, z-spacing 0.5 µm). Data from Figure 1g and f was fit to a four-parametric logistic  
692 population growth model with variable slope using Prism 5.01 (Graphpad)

693 
$$y = a + (b-a) * (1+10^{(\text{Log}(t1/2-t)-n)})^{-1}$$

694 with  $y$  = normalized eGFP.OR3 events per cell,  $a$  = Y value at the bottom plateau,  $b$  = Y value at the top  
695 plateau,  $t$  = h p.i.,  $t_{1/2}$  = time at half maximal signal and  $n$  = slope factor.

## 696 **STED microscopy**

697  $3.33 \times 10^3$  SNAP.OR3 expressing cells were seeded on 15-well  $\mu$ -Slides Angiogenesis (ibidi) and infected as  
698 described above. Prior to fixation, cells were incubated with 2  $\mu$ M SNAP-Cell® 647-SiR (New England  
699 Biolabs) for 30 min at 37 °C, washed three times and fixed with 4 % PFA (15 min). STED microscopy was  
700 performed using a 775 nm STED system (Abberior Instruments GmbH, Germany) equipped with a 100 x  
701 oil immersion objective (NA 1.4; Olympus UPlanSApo). STED Images were acquired using the 590 and 640  
702 nm excitation laser lines while the 405 and 488 laser lines were acquired in confocal mode. Nominal STED  
703 laser power was set to 80 % of the maximal power (1250 mW) with 20  $\mu$ s pixel dwell time and 15 nm pixel  
704 size. STED Images were linearly deconvolved with a Lorentzian function (FWHM 50 nm) using the  
705 Richardson-Lucy algorithm and the software Imspector (Abberior Instruments GmbH).

## 706 **Image analysis and data visualization**

707 The images were filtered in Fiji/ImageJ (Schindelin et al., 2012) with a mean filter (kernel size:  $0.26 \times 0.26$   
708  $\mu$ m) to reduce noise. For visualization some of the low signal-to-noise 3D movies were denoised using  
709 content-aware image restoration (CARE) (Weigert et al., 2018) as indicated. Convolutional neuronal  
710 networks were trained with a set of fixed cell images recorded with high laser power/long camera  
711 exposure (ground truth) and low laser power/short camera exposure (noisy training input) using the  
712 Python toolbox CSBdeep (Weigert et al., 2018). The model was then applied to reconstruct raw movies in  
713 Fiji using the CSBdeep CARE plugin. Quantification of fluorescent spot intensities was performed using Icy  
714 (de Chaumont et al., 2012). Raw 3D stacks were used to detect volumes of IN objects using the spot  
715 detector plugin. Methanol-induced shrinkage of cells in z orientation and infection-induced invaginations  
716 of the nuclear envelope renders automated nuclei detection difficult. To ensure that only truly nuclear  
717 objects (and not still NE-associated ones) were classified as such, they were manually curated and  
718 ambiguous particles were excluded. Objects displaying positive signals in the lamin channel were  
719 classified as nuclear envelope (NE) associated in the TZM-bl experiments. For measurements in primary  
720 CD4<sup>+</sup> T cells we applied a more stringent classification, manually excluding objects that did not colocalize  
721 with lamin in the major part of the signal or were localized above/below the focal planes of the nucleus.  
722 Cell-specific local background was subtracted for CA quantification. For quantification of CPSF6 intensities,  
723 the diffusive nuclear expression level of the cell was measured (using a ROI without punctae) and

724 intensities of CPSF6 accumulations at IN objects were normalized to the expression level of the cell.  
725 Nuclear OR3 punctae were counted if their intensity was  $\geq 20\%$  above the diffuse nuclear expression level  
726 of the respective cell. Colocalization was scored when the pixel areas of the respective fluorescent spots  
727 (partially) overlapped. Tracking was performed using the Fiji plugin Manual Tracking. Fiji standard “Fire”  
728 lookup table (LUT) was used for visualization of single channel images. Statistical tests were performed  
729 using Prism v5.01 (GraphPad Software Inc., USA). Data were plotted using Prism v5.01 or the Python  
730 statistical data visualization package matplotlib v3.1.3 (Hunter, 2007) and seaborn v0.10.0 (Michael  
731 Waskom et al., 2020). Graphs show mean with error bars defined in the figure legends.

### 732 **Quantification of RT products**

733 Particle preparations filtered through 0.45  $\mu\text{m}$  CME were treated with 15 U/mL DNaseI (Sigma Aldrich) /  
734 10 mM  $\text{MgCl}_2$  for 3-4 h at 37 °C prior to ultracentrifugation.  $5 \times 10^4$  TZM-bl cells were seeded into 24-well  
735 plates and infected the following day using 10-30  $\mu\text{U}$  RT/cell. At the indicated h p.i. cells were washed,  
736 scraped and lysed using 50  $\mu\text{l}$  of 10 mM Tris-HCl pH 9.0, 0.1 % TX-100, 400  $\mu\text{g}/\text{mL}$  proteinase K (Thermo  
737 Fisher Scientific) at 55 °C overnight. Proteinase K was inactivated at 95 °C for 10 min and lysates were  
738 stored at -20 °C. Alternatively, DNA was purified from cells using the DNeasy Blood and Tissue Kit (Qiagen,  
739 Germany) according to the manufacturer’s instructions. Lysates were directly used as input for ddPCR;  
740 purified DNA was prediluted to  $\sim 20$  ng/ $\mu\text{l}$ . For *gag* cDNA detection, this input was additionally diluted 1:20  
741 to prevent saturation. ddPCR was performed using the QX200 droplet generator/reader (BioRad, USA)  
742 and analyzed using QuantaSoft v1.7.4 (BioRad) as described earlier (Bejarano et al., 2018; Zila et al., 2019).

### 743 **Quantification of viral RNA transcripts**

744 eBFP2.LMNb1 and eGFP.OR3 expressing TZM-bl cells were infected with VSV-G pseudotyped NL4-3 ANCH  
745 (5  $\mu\text{Units}$  RT/cell; MOI  $\sim 1$ ) for 55 h. 20  $\mu\text{M}$  RAL was added at the time of infection. 8 h prior to RNA  
746 extraction and purification using the Invitrap spin universal RNA mini kit (Stratec biomedical, Germany),  
747 medium was changed for medium containing 1-25  $\mu\text{M}$  flavopiridol (Sigma Aldrich) or 1-25  $\mu\text{M}$  5,6-  
748 dichloro-1-beta-D-ribofuranosylbenzimidazole (DRB; Sigma Aldrich) as indicated. Quantitative reverse  
749 transcription PCR was performed as previously described (Marini et al., 2015). Briefly, messenger RNA  
750 (mRNA) levels were quantified by TaqMan quantitative RT-PCR (qRT-PCR). First, the RT reaction was  
751 performed using M-MLV RT (Invitrogen) and a random primer set (Invitrogen, cat. no.: 48190011),  
752 followed by qPCR using HIV-1 primers and probes (specific for transcription of the first nucleosome *nuc1a*  
753 or *gag/u1a*) and the housekeeping genes 18S and GAPDH (both containing VIC™/TAMRA™ fluorescent  
754 probe; Applied Biosystems, USA) as controls (see list of primers).

755 **Quantification of integrated proviral DNA using Alu PCR.**

756  $2 \times 10^5$  SupT1 cells were infected using VSV-G pseudotyped HIV-1 NL4-3 ANCH (10  $\mu$ U RT/cell) for 24 or 48  
757 h. 20  $\mu$ m Ral or 20  $\mu$ m EFV was added at the time of infection. Cells were washed, lysed and genomic DNA  
758 was extracted using the DNeasy Blood and Tissue Kit (Qiagen) according to the manufacturer's  
759 instructions. Nested Alu-LTR PCR was performed as described before (Tan et al., 2006). Briefly, Alu-LTR  
760 fragments were amplified starting from 100 ng of genomic DNA. The product of the first amplification was  
761 diluted 1:50 in H<sub>2</sub>O and amplified by qPCR. The B13 region of the housekeeping gene lamin B2 was  
762 amplified from 10 ng of genomic DNA for normalization (Livak & Schmittgen, 2001). The copy number  
763 (Log<sub>10</sub>) of integrated HIV-1 DNA per million cells was calculated using a standard curve obtained by serially  
764 diluting DNA from HIV-1 infected and sorted p24<sup>+</sup> cells with DNA from uninfected cells as described before  
765 (Shytaj et al., 2020).

766 **CLEM sample preparation**

767  $1.2 \times 10^5$  TZM-bl mScarlet.OR3 cells were grown on 3-mm sapphire discs in a 35 mm glass-bottom dish  
768 (MatTek, USA). Cells were infected with VSV-G pseudotyped IN.SNAP.SiR labelled NNHIV ANCH (30  $\mu$ U  
769 RT/cell) and incubated for 24 h at 37 °C. Subsequently, cells were cryo-immobilized by high pressure  
770 freezing (HPF) (HPM010; Abra Fluid, Switzerland) and transferred to freeze-substitution (FS) medium (0.1  
771 % uranyl acetate, 2.3 % methanol and 1 % H<sub>2</sub>O in Acetone) tempered at -90 °C. Freeze-substituted samples  
772 were embedded in Lowicryl HM20 resin (Polysciences, USA) inside a FS device (AFS2, Leica, Germany)  
773 equipped with a robotic solution handler (FSP, Leica). FS and embedding into Lowicryl resin was  
774 performed according to Kukulski *et al.* (Kukulski et al., 2011) with modifications (Zila et al., 2020).  
775 Temperature was raised to -45 °C at 7.5 °C/h. Samples were washed with acetone (4 × 25 min) and  
776 infiltrated with increasing concentrations of Lowicryl in acetone (25, 50 and 75 %; 3 h each), while raising  
777 temperature to -25 °C (3.3 °C / h). The acetone-resin mixture was replaced by Lowicryl HM20 for 1 h and  
778 the resin was exchanged three times (3, 5 and 12 h). Samples were polymerized under UV light for 24 h at  
779 -25 °C. Polymerization continued for an additional 24 h while the temperature was raised to 20 °C at 3.7  
780 °C/h.

781 **CLEM and electron tomography (ET)**

782 Thick resin sections (250 nm) were cut using a microtome (EM UC7, Leica) and placed on a slot (1 × 2 mm)  
783 EM copper grid covered with a formvar film (FF2010-Cu, Electron Microscopy Sciences, USA). Sections  
784 were covered by 0.1  $\mu$ m TetraSpeck microsphere fiducials (Thermo Fisher Scientific). Nuclear regions were  
785 stained with 50  $\mu$ g/ml Hoechst (Thermo Fisher Scientific). For SDCM, grids were transferred to 25 mm



786 glass coverslips mounted in a water-filled ring holder (Attofluor cell chamber, Thermo Fisher Scientific). Z  
787 stacks of cell sections were acquired using the PerkinElmer UltraVIEW VoX 3D Spinning-disc Confocal  
788 Microscope described above (z-spacing 200 nm). To identify mScarlet.OR3 and IN.SNAP.SiR signals in cell  
789 sections, images were visually examined using Fiji (Schindelin et al., 2012). Subsequently, both sides of  
790 EM grids were decorated with 15 nm protein-A gold particles for tomogram alignment and contrasted  
791 with 3 % uranyl acetate (in 70 % methanol) and lead citrate. Individual grids were placed in a high-tilt  
792 holder (Fischione Model 2040) and loaded into the Tecnai TF20 (FEI, Eindhoven, Netherlands) electron  
793 microscope operated at 200 kV, equipped with a field emission gun and a 4 K by 4 K pixel Eagle CCD camera  
794 (FEI, USA). To identify positions for ET, a full grid map was acquired using SerialEM (Mastronarde, 2005)  
795 and acquired electron micrographs were pre-correlated with imported SDCM images in SerialEM using  
796 fiducials as landmark points (Schorb et al., 2017). Single-axis electron tomograms of selected regions were  
797 then carried out. Tomographic tilt ranges were from -60 ° to 60 ° with an angular increment of 1 ° and  
798 pixel size 1.13 nm. Alignments and 3D reconstructions of tomograms were done using IMOD (Kremer et  
799 al., 1996). For high precision post-correlation, tomograms of cell sections were acquired at lower  
800 magnification with 4 ° increment and 6.3 nm pixel size. Post-correlation was performed using the eC-CLEM  
801 plugin (Paul-Gilloteaux et al., 2017) in Icy (de Chaumont et al., 2012). Segmentation and rendering was  
802 performed in Amira (Thermo Scientific).

### 803 **Data availability**

804 Data are available from the corresponding author upon request. Constructs and cell lines are available  
805 upon request. Materials involving the ANCHOR system are MTA-restricted and commercially available  
806 from NeoVirTech (France).

807

808

## 809 **Acknowledgements**

810 The ANCHOR system is developed by and commercially available from NeoVirTech (France,  
811 [www.neovirtech.com](http://www.neovirtech.com)). We gratefully acknowledge H. Wodrich (University of Bordeaux, France) and F.  
812 Gallardo (NeoVirTech) for helpful discussions. We thank David Bejarano (University Hospital Heidelberg,  
813 Germany) for providing pVpr-IN<sub>D64N/D116N</sub>.eGFP. EBFP2-LaminB1-10 was a gift from Michael Davidson  
814 (Addgene plasmid # 55244), pSNAP-tag (m) Vector from New England Biolabs & Ana Egana (Addgene  
815 plasmid # 101135), pmScarlet\_C1 from Dorus Gadella (Addgene plasmid # 85042), psPAX2 from Didier  
816 Trono (Addgene plasmid #12260) and pCMV-VSV-G was from Bob Weinberg (Addgene plasmid #8454).  
817 We thank Anke-Mareil Heuser and Vera Sonntag-Buck for excellent technical assistance. We would like to  
818 acknowledge the microscopy support from the Infectious Diseases Imaging Platform (IDIP) of the Center  
819 for Integrative Infectious Disease Research, Heidelberg.

820 This work was funded by the Deutsche Forschungsgemeinschaft (DFG, German Research Foundation) –  
821 Projektnummer 240245660 – SFB 1129 project 5 (H-G.K.), project 6 (B.M.), project 20 (M.L.) and by the  
822 TTU HIV in the DZIF (V.L., M.L., H-G.K.).

## 823 **Competing interests**

824 The authors declare no competing interests.

825

826

## 827 References

- 828 Albanese, A., Arosio, D., Terreni, M., & Cereseto, A. (2008). HIV-1 pre-integration complexes selectively  
829 target decondensed chromatin in the nuclear periphery. *PLoS One*, *3*(6).
- 830 Bejarano, D. A., Peng, K., Laketa, V., Börner, K., Jost, K. L., Lucic, B., Glass, B., Lusic, M., Müller, B., &  
831 Kräusslich, H.-G. (2019). HIV-1 nuclear import in macrophages is regulated by CPSF6-capsid  
832 interactions at the nuclear pore complex. *eLife*, *8*, e41800. <https://doi.org/10.7554/eLife.41800>
- 833 Bejarano, D. A., Puertas, M. C., Börner, K., Martinez-Picado, J., Müller, B., & Kräusslich, H.-G. (2018).  
834 Detailed characterization of early HIV-1 replication dynamics in primary human macrophages.  
835 *Viruses*, *10*(11), 620.
- 836 Bindels, D. S., Haarbosch, L., van Weeren, L., Postma, M., Wiese, K. E., Mastop, M., Aumonier, S., Gotthard,  
837 G., Royant, A., Hink, M. A., & Gadella, T. W. J. (2016). mScarlet: A bright monomeric red  
838 fluorescent protein for cellular imaging. *Nature Methods*, *14*(1), 53–56.  
839 <https://doi.org/10.1038/nmeth.4074>
- 840 Blanco-Rodriguez, G., Gazi, A., Monel, B., Frabetti, S., Scoca, V., Mueller, F., Schwartz, O., Krijnse-Locker,  
841 J., Charneau, P., & Nunzio, F. D. (2020). Remodeling of the Core Leads HIV-1 Preintegration  
842 Complex into the Nucleus of Human Lymphocytes. *Journal of Virology*, *94*(11).  
843 <https://doi.org/10.1128/JVI.00135-20>
- 844 Bohne, J., & Kräusslich, H.-G. (2004). Mutation of the major 5' splice site renders a CMV-driven HIV-1  
845 proviral clone Tat-dependent: Connections between transcription and splicing. *FEBS Letters*,  
846 *563*(1–3), 113–118.
- 847 Bozek, K., Eckhardt, M., Sierra, S., Anders, M., Kaiser, R., Kräusslich, H.-G., Müller, B., & Lengauer, T. (2012).  
848 An expanded model of HIV cell entry phenotype based on multi-parameter single-cell data.  
849 *Retrovirology*, *9*(1), 60.
- 850 Briggs, J. A., Wilk, T., Welker, R., Kräusslich, H.-G., & Fuller, S. D. (2003). Structural organization of  
851 authentic, mature HIV-1 virions and cores. *The EMBO Journal*, *22*(7), 1707–1715.
- 852 Burdick, R. C., Li, C., Munshi, M., Rawson, J. M. O., Nagashima, K., Hu, W.-S., & Pathak, V. K. (2020). HIV-1  
853 uncoats in the nucleus near sites of integration. *Proceedings of the National Academy of Sciences*.  
854 <https://doi.org/10.1073/pnas.1920631117>
- 855 Campbell, E. M., & Hope, T. J. (2015). HIV-1 capsid: The multifaceted key player in HIV-1 infection. *Nature*  
856 *Reviews Microbiology*, *13*(8), 471–483.
- 857 Chin, C. R., Perreira, J. M., Savidis, G., Portmann, J. M., Aker, A. M., Feeley, E. M., Smith, M. C., & Brass, A.  
858 L. (2015). Direct Visualization of HIV-1 Replication Intermediates Shows that Capsid and CPSF6  
859 Modulate HIV-1 Intra-nuclear Invasion and Integration. *Cell Reports*, *13*(8), 1717–1731.  
860 <https://doi.org/10.1016/j.celrep.2015.10.036>
- 861 Christensen, D. E., Ganser-Pornillos, B. K., Johnson, J. S., Pornillos, O., & Sundquist, W. I. (2020).  
862 Reconstitution and visualization of HIV-1 capsid-dependent replication and integration in vitro.  
863 *Science*, *370*(6513), eabc8420. <https://doi.org/10.1126/science.abc8420>
- 864 Cosnefroy, O., Murray, P. J., & Bishop, K. N. (2016). HIV-1 capsid uncoating initiates after the first strand  
865 transfer of reverse transcription. *Retrovirology*, *13*(1). [https://doi.org/10.1186/s12977-016-0292-](https://doi.org/10.1186/s12977-016-0292-7)  
866 [7](https://doi.org/10.1186/s12977-016-0292-7)
- 867 de Chaumont, F., Dallongeville, S., Chenouard, N., Hervé, N., Pop, S., Provoost, T., Meas-Yedid, V.,  
868 Pankajakshan, P., Lecomte, T., Le Montagner, Y., Lagache, T., Dufour, A., & Olivo-Marin, J.-C.  
869 (2012). Icy: An open bioimage informatics platform for extended reproducible research. *Nature*  
870 *Methods*, *9*(7), 690–696. <https://doi.org/10.1038/nmeth.2075>
- 871 Dharan, A., Bachmann, N., Talley, S., Zwickelmaier, V., & Campbell, E. M. (2020). Nuclear pore blockade  
872 reveals that HIV-1 completes reverse transcription and uncoating in the nucleus. *Nature*  
873 *Microbiology*, 1–8. <https://doi.org/10.1038/s41564-020-0735-8>

- 874 Dharan, A., Talley, S., Tripathi, A., Mamede, J. I., Majetschak, M., Hope, T. J., & Campbell, E. M. (2016).  
875 KIF5B and Nup358 cooperatively mediate the nuclear import of HIV-1 during infection. *PLoS*  
876 *Pathogens*, *12*(6), e1005700.
- 877 Doitsh, G., Galloway, N. L. K., Geng, X., Yang, Z., Monroe, K. M., Zepeda, O., Hunt, P. W., Hatano, H.,  
878 Sowinski, S., Munoz-Arias, I., & Greene, W. C. (2014). Cell death by pyroptosis drives CD4 T-cell  
879 depletion in HIV-1 infection. *Nature*, *505*(7484), 509–514.
- 880 Fernandez, J., Machado, A. K., Lyonnais, S., Chamontin, C., Gärtner, K., Léger, T., Henriquet, C., Garcia, C.,  
881 Portilho, D. M., Pugnère, M., Chaloin, L., Muriaux, D., Yamauchi, Y., Blaise, M., Nisole, S., & Arhel,  
882 N. J. (2019). Transportin-1 binds to the HIV-1 capsid via a nuclear localization signal and triggers  
883 uncoating. *Nature Microbiology*, *4*(11), 1840–1850. <https://doi.org/10.1038/s41564-019-0575-6>
- 884 Francis, A. C., & Melikyan, G. B. (2018). Single HIV-1 Imaging Reveals Progression of Infection through CA-  
885 Dependent Steps of Docking at the Nuclear Pore, Uncoating, and Nuclear Transport. *Cell Host &*  
886 *Microbe*, *23*(4), 536-548.e6. <https://doi.org/10.1016/j.chom.2018.03.009>
- 887 Geis, F. K., & Goff, S. P. (2019). Unintegrated HIV-1 DNAs are loaded with core and linker histones and  
888 transcriptionally silenced. *Proceedings of the National Academy of Sciences*, *116*(47), 23735–  
889 23742. <https://doi.org/10.1073/pnas.1912638116>
- 890 Germier, T., Kocanova, S., Walther, N., Bancaud, A., Shaban, H. A., Sellou, H., Politi, A. Z., Ellenberg, J.,  
891 Gallardo, F., & Bystricky, K. (2017). Real-Time Imaging of a Single Gene Reveals Transcription-  
892 Initiated Local Confinement. *Biophysical Journal*, *113*(7), 1383–1394.  
893 <https://doi.org/10.1016/j.bpj.2017.08.014>
- 894 Hulme, A. E., Kelley, Z., Foley, D., & Hope, T. J. (2015). Complementary assays reveal a low level of CA  
895 associated with viral complexes in the nuclei of HIV-1-infected cells. *Journal of Virology*, *89*(10),  
896 5350–5361.
- 897 Hunter, J. D. (2007). Matplotlib: A 2D Graphics Environment. *COMPUTING IN SCIENCE & ENGINEERING*,  
898 *9*(3), 0090–95.
- 899 Keppler, A., Gendreizig, S., Gronemeyer, T., Pick, H., Vogel, H., & Johnsson, K. (2003). A general method  
900 for the covalent labeling of fusion proteins with small molecules in vivo. *Nature Biotechnology*,  
901 *21*(1), 86–89.
- 902 Klasse, P. J. (2015). Molecular determinants of the ratio of inert to infectious virus particles. In *Progress in*  
903 *molecular biology and translational science* (Vol. 129, pp. 285–326). Elsevier.
- 904 Komatsu, T., Quentin-Froignant, C., Carlon-Andres, I., Lagadec, F., Rayne, F., Ragues, J., Kehlenbach, R. H.,  
905 Zhang, W., Ehrhardt, A., Bystricky, K., Morin, R., Lagarde, J.-M., Gallardo, F., & Wodrich, H. (2018).  
906 In Vivo Labelling of Adenovirus DNA Identifies Chromatin Anchoring and Biphasic Genome  
907 Replication. *Journal of Virology*, *92*(18). <https://doi.org/10.1128/JVI.00795-18>
- 908 Kremer, J. R., Mastrorarde, D. N., & McIntosh, J. R. (1996). Computer visualization of three-dimensional  
909 image data using IMOD. *Journal of Structural Biology*, *116*(1), 71–76.
- 910 Kukulski, W., Schorb, M., Welsch, S., Picco, A., Kaksonen, M., & Briggs, J. A. (2011). Correlated fluorescence  
911 and 3D electron microscopy with high sensitivity and spatial precision. *Journal of Cell Biology*,  
912 *192*(1), 111–119.
- 913 Lee, K., Ambrose, Z., Martin, T. D., Oztop, I., Mulky, A., Julias, J. G., Vandegraaff, N., Baumann, J. G., Wang,  
914 R., & Yuen, W. (2010). Flexible use of nuclear import pathways by HIV-1. *Cell Host & Microbe*, *7*(3),  
915 221–233.
- 916 Li, L., Olvera, J. M., Yoder, K. E., Mitchell, R. S., Butler, S. L., Lieber, M., Martin, S. L., & Bushman, F. D.  
917 (2001). Role of the non-homologous DNA end joining pathway in the early steps of retroviral  
918 infection. *The EMBO Journal*, *20*(12), 3272–3281.
- 919 Livak, K. J., & Schmittgen, T. D. (2001). Analysis of relative gene expression data using real-time  
920 quantitative PCR and the 2- $\Delta\Delta$ CT method. *Methods*, *25*(4), 402–408.

- 921 Lusic, M., & Siliciano, R. F. (2017). Nuclear landscape of HIV-1 infection and integration. *Nature Reviews*  
922 *Microbiology*, 15(2), 69.
- 923 Mamede, J. I., Cianci, G. C., Anderson, M. R., & Hope, T. J. (2017). Early cytoplasmic uncoating is associated  
924 with infectivity of HIV-1. *Proceedings of the National Academy of Sciences*, 114(34), E7169–E7178.
- 925 Mariamé, B., Kappler-Gratias, S., Kappler, M., Balor, S., Gallardo, F., & Bystricky, K. (2018). Real-Time  
926 Visualization and Quantification of Human Cytomegalovirus Replication in Living Cells Using the  
927 ANCHOR DNA Labeling Technology. *Journal of Virology*, 92(18).  
928 <https://doi.org/10.1128/JVI.00571-18>
- 929 Marini, B., Kertesz-Farkas, A., Ali, H., Lucic, B., Lisek, K., Manganaro, L., Pongor, S., Luzzati, R., Recchia, A.,  
930 Mavilio, F., Giacca, M., & Lusic, M. (2015). Nuclear architecture dictates HIV-1 integration site  
931 selection. *Nature*, 521(7551), 227–231. <https://doi.org/10.1038/nature14226>
- 932 Mastronarde, D. N. (2005). Automated electron microscope tomography using robust prediction of  
933 specimen movements. *Journal of Structural Biology*, 152(1), 36–51.
- 934 Mattei, S., Glass, B., Hagen, W. J., Kräusslich, H.-G., & Briggs, J. A. (2016). The structure and flexibility of  
935 conical HIV-1 capsids determined within intact virions. *Science*, 354(6318), 1434–1437.
- 936 Michael Waskom, Olga Botvinnik, Joel Ostblom, Saulius Lukauskas, Paul Hobson, MaozGelbart, David C  
937 Gemperline, Tom Augspurger, Yaroslav Halchenko, John B. Cole, Jordi Warmenhoven, Julian de  
938 Ruiten, Cameron Pye, Stephan Hoyer, Jake Vanderplas, Santi Villalba, Gero Kunter, Eric Quintero,  
939 Pete Bachant, ... Constantine Evans. (2020). *mwaskom/seaborn: V0.10.0 (January 2020)*. Zenodo.  
940 <https://doi.org/10.5281/zenodo.3629446>
- 941 Miron, E., Oldenkamp, R., Brown, J. M., Pinto, D. M. S., Xu, C. S., Faria, A. R., Shaban, H. A., Rhodes, J. D.  
942 P., Innocent, C., de Ornellas, S., Hess, H. F., Buckle, V., & Schermelleh, L. (2020). Chromatin  
943 arranges in chains of mesoscale domains with nanoscale functional topography independent of  
944 cohesin. *Science Advances*, 6(39), eaba8811. <https://doi.org/10.1126/sciadv.aba8811>
- 945 Monroe, K. M., Yang, Z., Johnson, J. R., Geng, X., Doitsh, G., Krogan, N. J., & Greene, W. C. (2014). IFI16  
946 DNA Sensor Is Required for Death of Lymphoid CD4 T Cells Abortively Infected with HIV. *Science*,  
947 343(6169), 428–432. <https://doi.org/10.1126/science.1243640>
- 948 Müller, T. G., Sakin, V., & Müller, B. (2019). A Spotlight on Viruses-Application of Click Chemistry to  
949 Visualize Virus-Cell Interactions. *Molecules (Basel, Switzerland)*, 24(3).  
950 <https://doi.org/10.3390/molecules24030481>
- 951 Novikova, M., Zhang, Y., Freed, E. O., & Peng, K. (2019). Multiple Roles of HIV-1 Capsid during the Virus  
952 Replication Cycle. *Virologica Sinica*, 34(2), 119–134. [https://doi.org/10.1007/s12250-019-00095-](https://doi.org/10.1007/s12250-019-00095-3)  
953 3
- 954 Paul-Gilloteaux, P., Heiligenstein, X., Belle, M., Domart, M.-C., Larijani, B., Collinson, L., Raposo, G., &  
955 Salamero, J. (2017). EC-CLEM: flexible multidimensional registration software for correlative  
956 microscopies. *Nature Methods*, 14(2), 102–103.
- 957 Pear, W. S., Nolan, G. P., Scott, M. L., & Baltimore, D. (1993). Production of high-titer helper-free  
958 retroviruses by transient transfection. *Proceedings of the National Academy of Sciences*, 90(18),  
959 8392–8396.
- 960 Peng, K., Muranyi, W., Glass, B., Laketa, V., Yant, S. R., Tsai, L., Cihlar, T., Müller, B., & Kräusslich, H.-G.  
961 (2015). Quantitative microscopy of functional HIV post-entry complexes reveals association of  
962 replication with the viral capsid. *Elife*, 3, e04114.
- 963 Pertel, T., Reinhard, C., & Luban, J. (2011). Vpx rescues HIV-1 transduction of dendritic cells from the  
964 antiviral state established by type 1 interferon. *Retrovirology*, 8(1), 49.
- 965 Pizzato, M., Erlwein, O., Bonsall, D., Kaye, S., Muir, D., & McClure, M. O. (2009). A one-step SYBR Green I-  
966 based product-enhanced reverse transcriptase assay for the quantitation of retroviruses in cell  
967 culture supernatants. *Journal of Virological Methods*, 156(1), 1–7.  
968 <https://doi.org/10.1016/j.jviromet.2008.10.012>

- 969 Price, A. J., Fletcher, A. J., Schaller, T., Elliott, T., Lee, K., KewalRamani, V. N., Chin, J. W., Towers, G. J., &  
970 James, L. C. (2012). CPSF6 defines a conserved capsid interface that modulates HIV-1 replication.  
971 *PLoS Pathog*, 8(8), e1002896.
- 972 Rankovic, S., Varadarajan, J., Ramalho, R., Aiken, C., & Rousso, I. (2017). Reverse transcription  
973 mechanically initiates HIV-1 capsid disassembly. *Journal of Virology*, 91(12), e00289-17.
- 974 Rasaiyaah, J., Tan, C. P., Fletcher, A. J., Price, A. J., Blondeau, C., Hilditch, L., Jacques, D. A., Selwood, D. L.,  
975 James, L. C., Noursadeghi, M., & Towers, G. J. (2013). HIV-1 evades innate immune recognition  
976 through specific cofactor recruitment. *Nature*, 503(7476), 402–405.  
977 <https://doi.org/10.1038/nature12769>
- 978 Rouzina, I., & Bruinsma, R. (2014). DNA confinement drives uncoating of the HIV Virus. *The European*  
979 *Physical Journal Special Topics*, 223(9), 1745–1754.
- 980 Saad, H., Gallardo, F., Dalvai, M., Tanguy-le-Gac, N., Lane, D., & Bystricky, K. (2014). DNA Dynamics during  
981 Early Double-Strand Break Processing Revealed by Non-Intrusive Imaging of Living Cells. *PLoS*  
982 *Genetics*, 10(3), e1004187. <https://doi.org/10.1371/journal.pgen.1004187>
- 983 Sanjuán, R. (2018). Collective properties of viral infectivity. *Current Opinion in Virology*, 33, 1–6.
- 984 Schaller, T., Ocwieja, K. E., Rasaiyaah, J., Price, A. J., Brady, T. L., Roth, S. L., Hué, S., Fletcher, A. J., Lee, K.,  
985 & KewalRamani, V. N. (2011). HIV-1 capsid-cyclophilin interactions determine nuclear import  
986 pathway, integration targeting and replication efficiency. *PLoS Pathog*, 7(12), e1002439.
- 987 Schindelin, J., Arganda-Carreras, I., Frise, E., Kaynig, V., Longair, M., Pietzsch, T., Preibisch, S., Rueden, C.,  
988 Saalfeld, S., & Schmid, B. (2012). Fiji: An open-source platform for biological-image analysis.  
989 *Nature Methods*, 9(7), 676–682.
- 990 Schorb, M., Gaechter, L., Avinoam, O., Sieckmann, F., Clarke, M., Bebeacua, C., Bykov, Y. S., Sonnen, A. F.-  
991 P., Lihl, R., & Briggs, J. A. (2017). New hardware and workflows for semi-automated correlative  
992 cryo-fluorescence and cryo-electron microscopy/tomography. *Journal of Structural Biology*,  
993 197(2), 83–93.
- 994 Selyutina, A., Persaud, M., Lee, K., KewalRamani, V., & Diaz-Griffero, F. (2020). Nuclear Import of the HIV-  
995 1 Core Precedes Reverse Transcription and Uncoating. *Cell Reports*, 32(13).  
996 <https://doi.org/10.1016/j.celrep.2020.108201>
- 997 Shytaj, I. L., Lucic, B., Forcato, M., Penzo, C., Billingsley, J., Laketa, V., Bosinger, S., Stanic, M., Gregoretti,  
998 F., Antonelli, L., Oliva, G., Frese, C. K., Trifunovic, A., Galy, B., Eibl, C., Silvestri, G., Bicciato, S.,  
999 Savarino, A., & Lusic, M. (2020). Alterations of redox and iron metabolism accompany the  
1000 development of HIV latency. *The EMBO Journal*, 39(9), e102209.  
1001 <https://doi.org/10.15252/embj.2019102209>
- 1002 Smith, S. D., Shatsky, M., Cohen, P. S., Warnke, R., Link, M. P., & Glader, E. (1984). *Monoclonal Antibody*  
1003 *and Enzymatic Profiles of Human Malignant T-Lymphoid Cells and Derived Cell Lines*. 44, 5.
- 1004 Stultz, R. D., Cenker, J. J., & McDonald, D. (2017). Imaging HIV-1 genomic DNA from entry through  
1005 productive infection. *Journal of Virology*, 91(9), e00034-17.
- 1006 Sunseri, N., O'Brien, M., Bhardwaj, N., & Landau, N. R. (2011). Human immunodeficiency virus type 1  
1007 modified to package Simian immunodeficiency virus Vpx efficiently infects macrophages and  
1008 dendritic cells. *Journal of Virology*, 85(13), 6263–6274.
- 1009 Suzuki, Y., & Craigie, R. (2007). The road to chromatin—Nuclear entry of retroviruses. *Nature Reviews*  
1010 *Microbiology*, 5(3), 187–196.
- 1011 Tan, W., Dong, Z., Wilkinson, T. A., Barbas, C. F., & Chow, S. A. (2006). Human immunodeficiency virus  
1012 type 1 incorporated with fusion proteins consisting of integrase and the designed polydactyl zinc  
1013 finger protein E2C can bias integration of viral DNA into a predetermined chromosomal region in  
1014 human cells. *Journal of Virology*, 80(4), 1939–1948.
- 1015 Trinh, T., Jessee, J., Bloom, F., & Hirsch, V. (1994). STBL2: An Escherichia coli strain for the stable  
1016 propagation of retroviral clones and direct repeat sequences. *Focus*, 16, 78–80.

- 1017 Trotard, M., Tsooulidis, N., Tibroni, N., Willemsen, J., Binder, M., Ruggieri, A., & Fackler, O. T. (2016).  
1018 Sensing of HIV-1 Infection in Tzm-bl Cells with Reconstituted Expression of STING. *Journal of*  
1019 *Virology*, *90*(4), 2064–2076. <https://doi.org/10.1128/JVI.02966-15>
- 1020 von Appen, A., Kosinski, J., Sparks, L., Ori, A., DiGiulio, A. L., Vollmer, B., Mackmull, M.-T., Banterle, N.,  
1021 Parca, L., & Kastritis, P. (2015). In situ structural analysis of the human nuclear pore complex.  
1022 *Nature*, *526*(7571), 140–143.
- 1023 Wei, X., Decker, J. M., Liu, H., Zhang, Z., Arani, R. B., Kilby, J. M., Saag, M. S., Wu, X., Shaw, G. M., & Kappes,  
1024 J. C. (2002). Emergence of resistant human immunodeficiency virus type 1 in patients receiving  
1025 fusion inhibitor (T-20) monotherapy. *Antimicrobial Agents and Chemotherapy*, *46*(6), 1896–1905.
- 1026 Weigert, M., Schmidt, U., Boothe, T., Müller, A., Dibrov, A., Jain, A., Wilhelm, B., Schmidt, D., Broaddus,  
1027 C., Culley, S., Rocha-Martins, M., Segovia-Miranda, F., Norden, C., Henriques, R., Zerial, M.,  
1028 Solimena, M., Rink, J., Tomancak, P., Royer, L., ... Myers, E. W. (2018). Content-aware image  
1029 restoration: Pushing the limits of fluorescence microscopy. *Nature Methods*, *15*(12), 1090–1097.  
1030 <https://doi.org/10.1038/s41592-018-0216-7>
- 1031 Xu, H., Franks, T., Gibson, G., Huber, K., Rahm, N., De Castillia, C. S., Luban, J., Aiken, C., Watkins, S., &  
1032 Sluis-Cremer, N. (2013). Evidence for biphasic uncoating during HIV-1 infection from a novel  
1033 imaging assay. *Retrovirology*, *10*(1), 70.
- 1034 Zhou, L., Sokolskaja, E., Jolly, C., James, W., Cowley, S. A., & Fassati, A. (2011). Transportin 3 promotes a  
1035 nuclear maturation step required for efficient HIV-1 integration. *PLoS Pathogens*, *7*(8), e1002194.
- 1036 Zila, V., Margiotta, E., Turonova, B., Müller, T. G., Zimmerli, C. E., Mattei, S., Allegretti, M., Börner, K., Rada,  
1037 J., Müller, B., Lusic, M., Kräusslich, H.-G., & Beck, M. (2020). Cone-shaped HIV-1 capsids are  
1038 transported through intact nuclear pores. *BioRxiv*, 2020.07.30.193524.  
1039 <https://doi.org/10.1101/2020.07.30.193524>
- 1040 Zila, V., Müller, T. G., Laketa, V., Müller, B., & Kräusslich, H.-G. (2019). Analysis of CA Content and CPSF6  
1041 Dependence of Early HIV-1 Replication Complexes in SupT1-R5 Cells. *MBio*, *10*(6).  
1042 <https://doi.org/10.1128/mBio.02501-19>  
1043  
1044

1045 **Supplementary Figures**

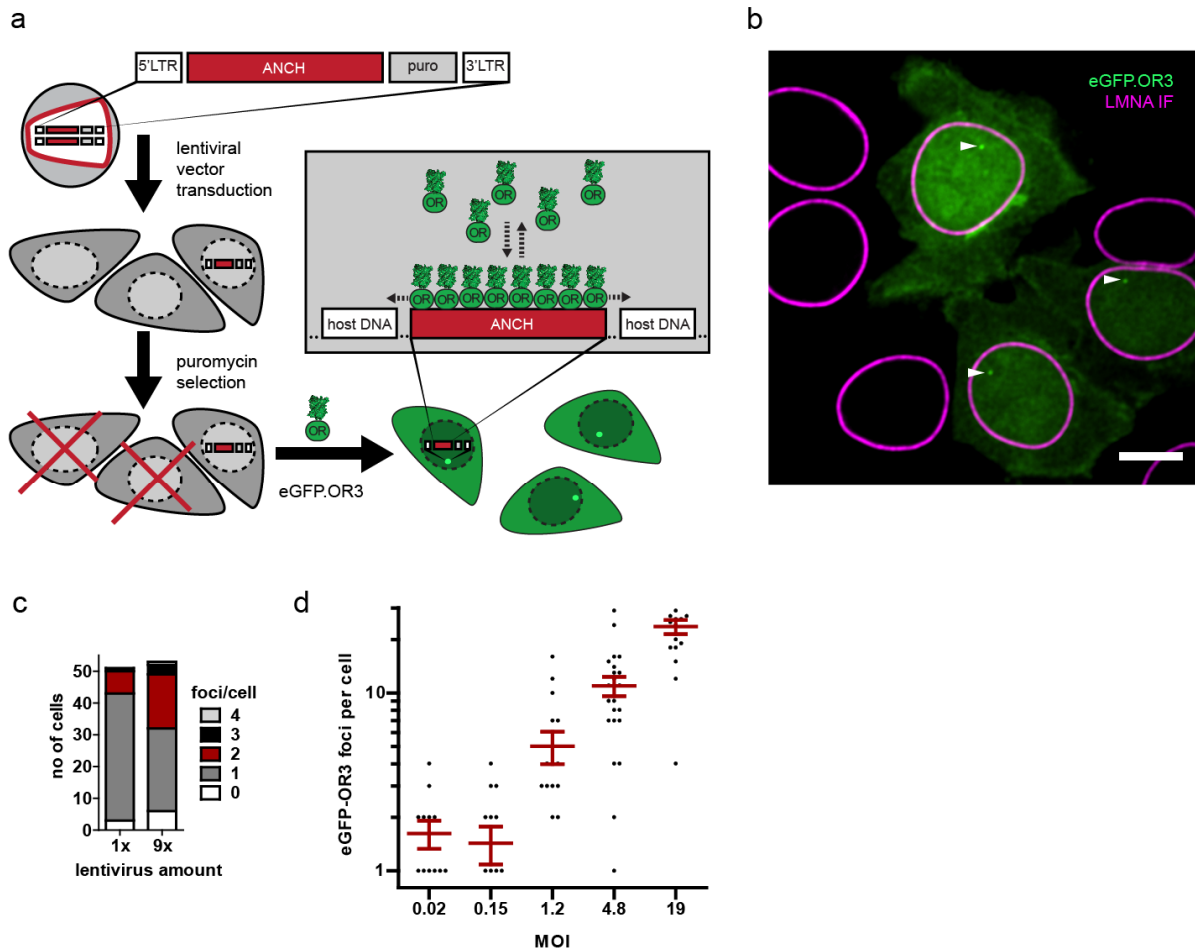

1046

1047 **Figure 1 — figure supplement 1 The ANCHOR system enables sensitive visualization of integrated lentiviral DNA**  
 1048 **without loss through recombination during reverse transcription.** (a) Scheme of experiment. A HIV-1 lentiviral  
 1049 vector harboring the ANCH sequence and a puromycin expression cassette was used to transduce TZM-bl cells. After  
 1050 2-3 days puromycin was added to deplete untransduced cells, after which eGFP.OR3 was delivered by lentiviral  
 1051 transduction or transfection. All surviving cells are expected to display one or more OR3 punctae in the nucleus. (b)  
 1052 Exemplary cells from low MOI transduction of cells using lentiviral particle containing supernatant. Scale bar: 5  $\mu$ m.  
 1053 One of two independent experiments is shown. (c) Quantification of spots per cell from 50  $\mu$ l (1x) and 450  $\mu$ l (9x)  
 1054 used supernatant. (d) Titration of concentrated lentiviral particles. MOI was determined by counting the number of  
 1055 surviving cell colonies 5 days after puromycin selection. The transduced cells were kept in culture for over 4 weeks  
 1056 to ensure degradation of unintegrated vDNA products. Error bars represent SEM.



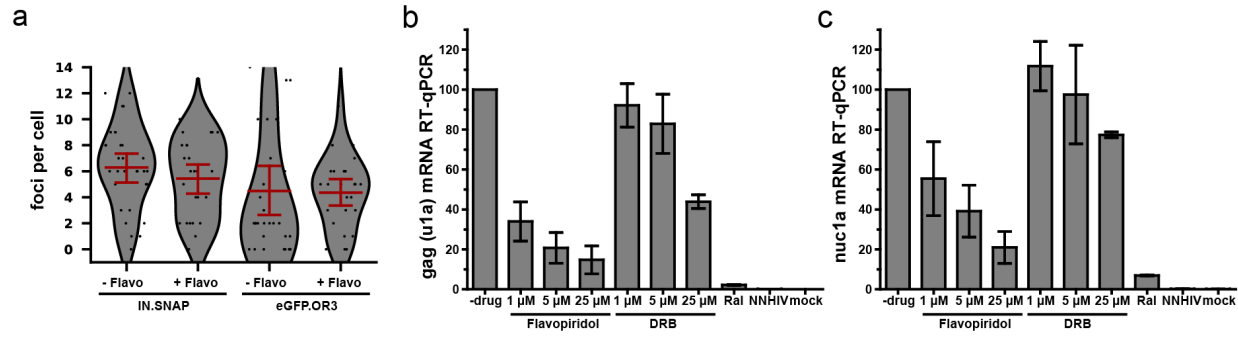

1057

1058 **Figure 1 — figure supplement 2 eGFP.OR3 punctae in infected cell nuclei are detected independent of HIV-1**  
1059 **transcription.** (a) eGFP.OR3 and eBFP2.LMNB1 expressing TZM-bl cells were infected with 30 μU RT/cell VSV-G  
1060 pseudotyped HIV ANCH for 47 h, after which 5 μM of the pTEF-b transcription initiation inhibitor Flavopiridol was  
1061 added for another 8 h. Number of nuclear IN.SNAP and eGFP.OR3 punctae were quantified. One of three  
1062 independent experiments is shown with n > 25 cells per sample, error bars represent 95 % CI. (b,c) qRT-PCR of viral  
1063 RNA products specific for *gag* (u1a) (b) and the transcription of the first nucleosome *nuc1a* (c) quantified at 55 h p.i..  
1064 eBFP2.LMNB1 and eGFP.OR3 expressing TZM-bl cells were infected with 5 μU RT/cell VSV-G pseudotyped HIV ANCH.  
1065 Flavopiridol and the transcription elongation inhibitor 5,6-dichloro-1-beta-D-ribofuranosylbenzimidazole (DRB) were  
1066 added 8 h prior RNA extraction. The experiment was performed in biological triplicates and error bars represent SD.

1067

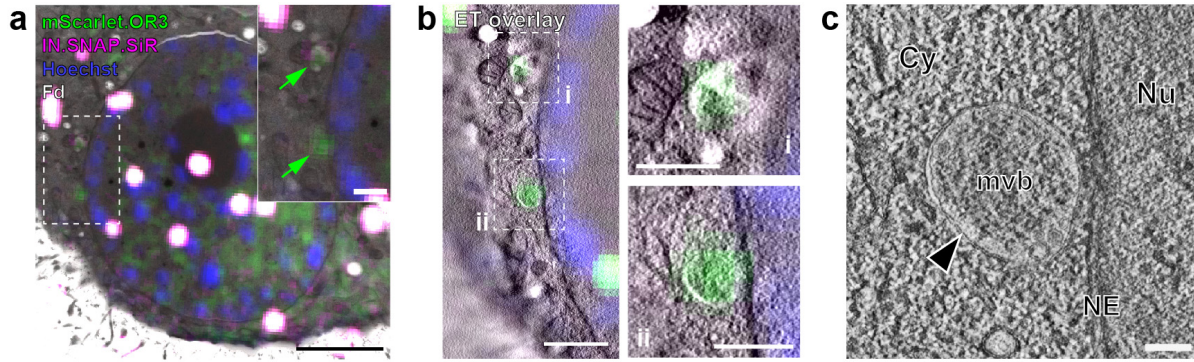

1068

1069 **Figure 1 — figure supplement 3 CLEM analysis of infection-independent cytoplasmic OR3 fusion protein**  
1070 **accumulations.** Experimental details as in Figure 5. (a) CLEM overlays (with enlargements) of EM sections of  
1071 infection-independent mScarlet.OR3 (green) accumulations. Shown is the same cell section as in Figure 5a. (b) CLEM-  
1072 ET overlay of regions enlarged in (a). (c) Computational slices from tomographic reconstructions at the correlated  
1073 positions boxed in (b, ii). Scale bars: 2.5  $\mu\text{m}$  (a), 750 nm (b), 500 nm for enlargements (a,b) and 100 nm (c).

1074

1075

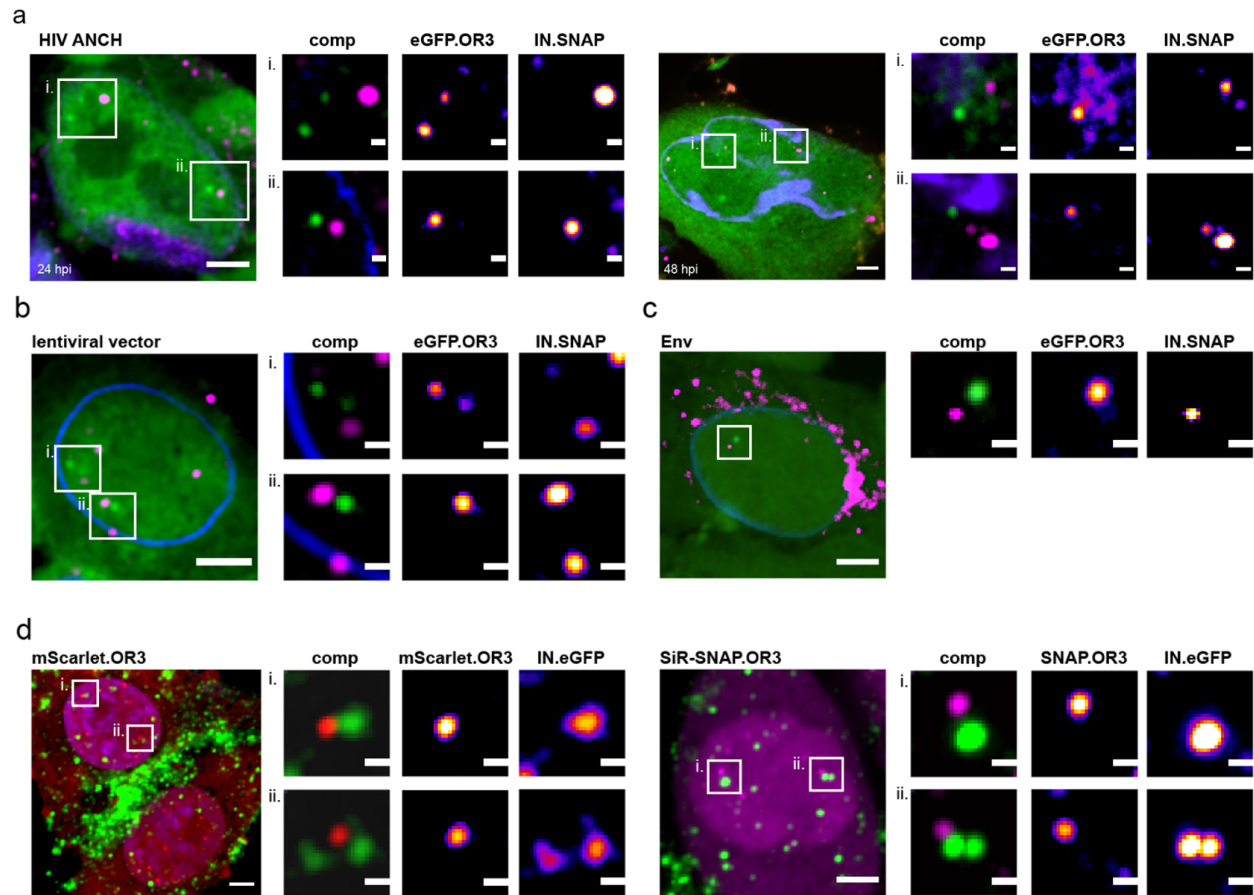

1076

1077 **Figure 3 — figure supplement 1 Different TZM-bl cell lines infected with different particles.** Infection was  
1078 performed using 30  $\mu$ l RT/cell of the following viral particles for 24 h p.i.: Integration competent HIV-1<sub>NL4-3</sub> ANCH  
1079 (a), an integration competent lentiviral vector (b), NNHIV ANCH (c,d) pseudotyped with HIV-1 Env fusion protein  
1080 instead of VSV-G (c) or with an inversion of the fluorescent proteins used (d). Separation between IN-FP and  
1081 eGFP.OR3 was observed in all cases. In enlargements OR3 background has been subtracted for clarity. Scale bars: 5  
1082  $\mu$ m (overview) and 1  $\mu$ m (enlargements); single z plane (a), 2.5  $\mu$ m z-projection (a-c, d right panel), z-projection of  
1083 entire nucleus (d left panel).

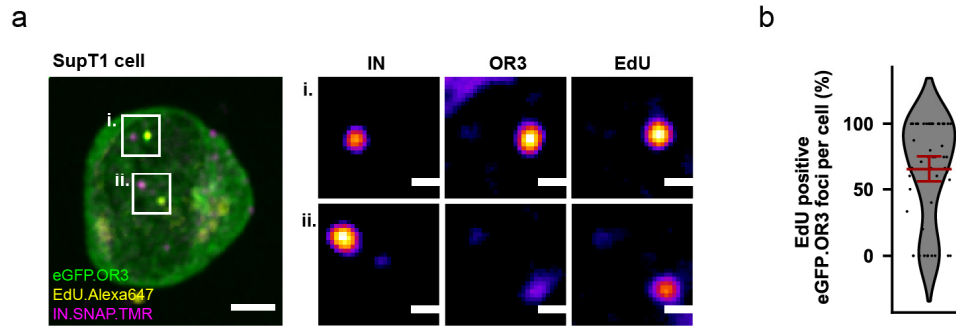

1084

1085 **Figure 6 — figure supplement 1 ANCHOR system adopted to the T cell line SupT1** (a) SupT1 cells expressing  
1086 eGFP. OR3 were infected with 30  $\mu$ U RT/cell VSV-G pseudotyped NNHIV ANCH in the presence of APC and EdU, fixed  
1087 and click labelled at 24 h p.i.. A similar separation between IN-FP and eGFP. OR3 as in TZM-bl cells was observed. In  
1088 enlargements the nuclear background of eGFP. OR3 has been subtracted for clarity. Scale bars: 5  $\mu$ m (overview) and  
1089 1  $\mu$ m (enlargement). (b) Quantification of EdU positive nuclear eGFP. OR3 spots per cell. Pooled data from biological  
1090 triplicates are shown, error bar represents 95 % CI.

1091

1092

- 1093 **Video 1: Live cell imaging of viral DNA punctae formation in TZM-bl cells.** Related to Figure 1g and h. While the  
1094 figure shows raw data (only mean filtered), for the movie 3D stacks were denoised using CARE and rendered in  
1095 napari (see material and methods for details). The movie is a composite of eBFP2.LMNB1 (magenta) and eGFP.OR3  
1096 (green). Scale bar: 5  $\mu\text{m}$  and time in hours:minutes post infection.
- 1097 **Video 2: Live cell imaging of eGFP.OR3 separation from IN.SNAP.** Related to Figure 3d and e. Shown is a maximum  
1098 intensity projection of a cell nucleus. The movie is a composite of eBFP2.LMNB1 (blue), eGFP.OR3 (green) and  
1099 IN.SNAP.SiR (magenta). Scale bar: 5  $\mu\text{m}$  and time in hours:minutes post infection.
- 1100 **Video 3: Live cell imaging of eGFP.OR3 separation from IN.SNAP.** Related to Figure 3d and e appearance of two  
1101 eGFP.OR3 punctae from a single IN-FP spot. Shown is a maximum intensity projection of a nuclear particle with the  
1102 nucleus at top left and the cytoplasm at the bottom right of the movie. The movie is a composite of eBFP2.LMNB1  
1103 (blue), eGFP.OR3 (green) and IN.SNAP.SiR (magenta). Scale bar: 2  $\mu\text{m}$  and time in hours:minutes post infection.
- 1104 **Video 4: CLEM-ET analysis, segmentation and rendering of nuclear capsid cone clustering in HeLa derived cells.**  
1105 Related to Figure 4e. Morphology of clustered capsid-related structures observed at the position indicated by an  
1106 IN.SNAP.SiR signal lacking mScarlet.OR3 signal.
- 1107 **Video 5: CLEM-ET analysis, segmentation and rendering of IN and OR3-positive structures in infected HeLa derived**  
1108 **cells.** Related to Figure 5i. Morphology of clustered capsid-related structures observed at the position indicated by  
1109 co-localizing mScarlet.OR3 and IN.SNAP.SiR.
